# Supplementary material for: Noninvasive prenatal testing for β-thalassemia by targeted nanopore sequencing combined with relative haplotype dosage (RHDO): a feasibility study
Source: PubMed Central journal article supplement (PMC7952549; doi:10.1038/s41598-021-85128-2), 2021-03-11
Supplement: 41598_2021_85128_MOESM5_ESM.pdf [file 41598_2021_85128_MOESM5_ESM.pdf]

Noninvasive prenatal testing for  $\beta$ -thalassemia by targeted nanopore sequencing combined with relative haplotype dosage (RHDO): a feasibility study

Fuman Jiang<sup>1,3#</sup>, Weiqiang Liu<sup>2#</sup>, Longmei Zhang<sup>4#</sup>, Yulai Guo<sup>4</sup>, Min Chen<sup>2</sup>, Xiaojing Zeng<sup>4</sup>, Yang Wang<sup>4</sup>, Yufan Li<sup>2</sup>, JiaJia Xian<sup>2</sup>, BoLe Du<sup>4</sup>, Yuhuan Xie<sup>2</sup>, Shuming Ouyang<sup>2</sup>, Sheng Li<sup>4</sup>, Yinghong Yang<sup>2</sup>, Chunsheng Zhang<sup>4</sup>, Fei Luo<sup>1</sup>, Xiaofang Sun<sup>2\*</sup>

<sup>1</sup>*School of Automation Science & Engineering, South China University of Technology, Guangzhou, 510641, China*

<sup>2</sup>*Department of Fetal Medicine and Prenatal Diagnosis, Key Laboratory for Major Obstetric Diseases of Guangdong Province, Key Laboratory of Reproduction and Genetics of Guangdong Higher Education Institutes, the Third Affiliated Hospital of Guangzhou Medical University, Guangzhou, 510150, China.*

<sup>3</sup>*Shenzhen Jingke Gene technology Co., Ltd, Shenzhen, 518052, China*

<sup>4</sup>*Guangzhou Jingke Medical Laboratory, Guangzhou, 510320, China*

#These authors contributed equally to this work.

\*Corresponding Author:

Xiaofang Sun, Prof.

The Third Affiliated Hospital of Guangzhou Medical University, 63 Duobao Rd.

Guangzhou 510150, China.

Tel: 86-020-81290072

Email: [xiaofangsun@gzhmu.edu.cn](mailto:xiaofangsun@gzhmu.edu.cn)

Supplementary Table S1: Summary of MinION sequencing statistics of 10 kb amplicons.

| Family |        | Mean read length (bp) | N50 length (bp) | Total reads | Ratio of mapped reads (%) | Sequencing depth | Ratio of >500×Sequencing depth (%) |
|--------|--------|-----------------------|-----------------|-------------|---------------------------|------------------|------------------------------------|
| F01    | Mother | 7203                  | 8920            | 154053      | 99.20                     | 20397.90         | 97.62                              |
|        | Father | 7388                  | 9068            | 64315       | 98.98                     | 8605.59          | 97.57                              |
| F02    | Mother | 7649                  | 9090            | 57553       | 99.21                     | 8061.52          | 97.59                              |
|        | Father | 7498                  | 9069            | 149320      | 99.19                     | 20548.17         | 97.62                              |
| F03    | Mother | 7350                  | 9074            | 121706      | 99.01                     | 16619.90         | 97.62                              |
|        | Father | 7440                  | 9058            | 139138      | 99.00                     | 19181.76         | 97.62                              |
| F04    | Mother | 8466                  | 9076            | 35160       | 99.38                     | 5617.16          | 95.05                              |
|        | Father | 8347                  | 9058            | 36868       | 99.19                     | 5745.64          | 95.25                              |
| F05    | Mother | 8234                  | 9003            | 33923       | 99.10                     | 5213.54          | 95.04                              |
|        | Father | 8332                  | 9023            | 32762       | 99.40                     | 5162.60          | 95.05                              |
| F06    | Mother | 8041                  | 9028            | 30080       | 99.22                     | 4540.28          | 95.02                              |
|        | Father | 8128                  | 9064            | 36406       | 99.18                     | 5515.64          | 95.04                              |
| F07    | Mother | 8337                  | 9053            | 30685       | 99.37                     | 4774.73          | 95.03                              |
|        | Father | 8298                  | 9056            | 27465       | 99.40                     | 4277.88          | 94.81                              |
| F08    | Mother | 8055                  | 9043            | 25294       | 99.27                     | 3862.64          | 94.76                              |
|        | Father | 8022                  | 8942            | 30415       | 99.29                     | 4596.45          | 93.81                              |
| F09    | Mother | 8367                  | 9042            | 27603       | 99.34                     | 4270.05          | 95.02                              |
|        | Father | 8616                  | 9080            | 25479       | 99.63                     | 4089.60          | 95.02                              |
| F10    | Mother | 8374                  | 9067            | 41233       | 99.32                     | 6468.11          | 97.53                              |
|        | Father | 8272                  | 9048            | 41741       | 99.19                     | 6381.27          | 97.57                              |
| F11    | Mother | 8374                  | 9072            | 36425       | 99.41                     | 5669.60          | 95.04                              |
|        | Father | 8436                  | 9093            | 37240       | 99.40                     | 5886.13          | 95.04                              |
| F12    | Mother | 8135                  | 9046            | 34669       | 99.29                     | 5265.08          | 95.00                              |
|        | Father | 8013                  | 8970            | 29625       | 99.20                     | 4403.64          | 95.04                              |
| F13    | Mother | 8177                  | 9023            | 43445       | 99.29                     | 6604.68          | 95.04                              |
|        | Father | 8205                  | 9044            | 36449       | 99.22                     | 5568.26          | 95.04                              |

Supplementary Table S2: Summary of MinION sequencing statistics of 20 kb amplicons.

| Family |        | Mean read length (bp) | N50 length (bp) | Total reads | Ratio of mapped reads (%) | Sequencing depth | Ratio of >200×Sequencing depth (%) |
|--------|--------|-----------------------|-----------------|-------------|---------------------------|------------------|------------------------------------|
| F01    | Mother | 5183                  | 9974            | 26827       | 97.80                     | 2785.06          | 95.06                              |
|        | Father | 13740                 | 16376           | 8818        | 99.40                     | 2425.28          | 99.98                              |
| F02    | Mother | 14059                 | 17464           | 7971        | 99.76                     | 2273.27          | 99.98                              |
|        | Father | 7147                  | 12307           | 9917        | 98.90                     | 1433.79          | 94.88                              |
| F03    | Mother | 13685                 | 16286           | 14575       | 99.60                     | 3918.15          | 100.00                             |
|        | Father | 6939                  | 11997           | 33995       | 97.77                     | 3247.75          | 95.01                              |
| F04    | Mother | 6730                  | 11923           | 41645       | 98.40                     | 5503.04          | 87.06                              |
|        | Father | 13947                 | 16527           | 7892        | 99.66                     | 2243.77          | 99.99                              |
| F05    | Mother | 13201                 | 16198           | 15239       | 99.42                     | 3944.91          | 100.00                             |
|        | Father | 4349                  | 7733            | 17754       | 97.56                     | 1485.53          | 84.69                              |
| F06    | Mother | 13315                 | 16205           | 11645       | 99.56                     | 3071.04          | 100.00                             |
|        | Father | 5439                  | 12386           | 26322       | 97.13                     | 2698.77          | 95.05                              |
| F07    | Mother | 13293                 | 17600           | 5649        | 99.58                     | 1939.15          | 61.54                              |
|        | Father | 13258                 | 16409           | 2092        | 99.71                     | 557.14           | 98.68                              |
| F08    | Mother | 7515                  | 15126           | 20111       | 97.68                     | 2835.02          | 95.03                              |
|        | Father | 7108                  | 15534           | 24666       | 98.38                     | 3468.16          | 95.04                              |
| F09    | Mother | 8587                  | 14926           | 5193        | 97.90                     | 795.61           | 94.96                              |
|        | Father | 7631                  | 15585           | 1443        | 97.85                     | 212.22           | 53.32                              |
| F10    | Mother | 12180                 | 16572           | 7762        | 99.34                     | 1681.47          | 95.05                              |
|        | Father | 7639                  | 15182           | 7419        | 96.47                     | 1099.48          | 94.99                              |
| F11    | Mother | 6117                  | 11445           | 15860       | 97.85                     | 1800.27          | 95.03                              |
|        | Father | 5634                  | 12920           | 1979        | 95.81                     | 217.86           | 53.11                              |
| F12    | Mother | 6772                  | 14888           | 38731       | 97.63                     | 5303.78          | 86.36                              |
|        | Father | 13502                 | 16028           | 11371       | 99.48                     | 3074.98          | 96.79                              |
| F13    | Mother | 3451                  | 6821            | 30973       | 94.87                     | 2105.60          | 91.99                              |
|        | Father | 13622                 | 16311           | 2818        | 99.65                     | 780.65           | 99.56                              |

Supplementary Table S3. Comparison between MinION sequencing data and NGS data of 10 kb amplicons.

| Family |        | Number of SNPs detected only by nanopore sequencing | Number of SNPs detected only by NGS | Number of SNPs detected by both methods | Number of the consistent SNPs detected by both methods | Number of heterozygous SNPs detected by both methods |
|--------|--------|-----------------------------------------------------|-------------------------------------|-----------------------------------------|--------------------------------------------------------|------------------------------------------------------|
| F01    | Mother | 1                                                   | 14                                  | 93                                      | 90                                                     | 49                                                   |
|        | Father | 4                                                   | 11                                  | 93                                      | 90                                                     | 51                                                   |
| F02    | Mother | 1                                                   | 13                                  | 97                                      | 96                                                     | 57                                                   |
|        | Father | 3                                                   | 16                                  | 92                                      | 91                                                     | 51                                                   |
| F03    | Mother | 8                                                   | 20                                  | 112                                     | 112                                                    | 41                                                   |
|        | Father | 1                                                   | 3                                   | 48                                      | 47                                                     | 6                                                    |
| F04    | Mother | 22                                                  | 4                                   | 106                                     | 106                                                    | 103                                                  |
|        | Father | 29                                                  | 1                                   | 54                                      | 52                                                     | 40                                                   |
| F05    | Mother | 30                                                  | 2                                   | 65                                      | 62                                                     | 50                                                   |
|        | Father | 20                                                  | 0                                   | 8                                       | 6                                                      | 6                                                    |
| F06    | Mother | 21                                                  | 1                                   | 48                                      | 47                                                     | 5                                                    |
|        | Father | 22                                                  | 6                                   | 99                                      | 97                                                     | 54                                                   |
| F07    | Mother | 22                                                  | 9                                   | 97                                      | 97                                                     | 54                                                   |
|        | Father | 18                                                  | 10                                  | 97                                      | 97                                                     | 95                                                   |
| F08    | Mother | 18                                                  | 1                                   | 50                                      | 48                                                     | 5                                                    |
|        | Father | 20                                                  | 8                                   | 125                                     | 120                                                    | 47                                                   |
| F09    | Mother | 21                                                  | 1                                   | 49                                      | 47                                                     | 5                                                    |
|        | Father | 21                                                  | 8                                   | 100                                     | 99                                                     | 56                                                   |
| F10    | Mother | 20                                                  | 1                                   | 47                                      | 45                                                     | 4                                                    |
|        | Father | 21                                                  | 5                                   | 99                                      | 98                                                     | 56                                                   |
| F11    | Mother | 22                                                  | 7                                   | 126                                     | 123                                                    | 51                                                   |
|        | Father | 28                                                  | 9                                   | 104                                     | 101                                                    | 89                                                   |
| F12    | Mother | 21                                                  | 7                                   | 97                                      | 96                                                     | 54                                                   |
|        | Father | 18                                                  | 5                                   | 101                                     | 100                                                    | 5                                                    |
| F13    | Mother | 20                                                  | 7                                   | 111                                     | 109                                                    | 50                                                   |
|        | Father | 23                                                  | 7                                   | 128                                     | 126                                                    | 51                                                   |

Supplementary Table S4. Comparison between MinION sequencing data and NGS data of 20 kb amplicons.

| Family |        | Number of SNPs detected only by nanopore sequencing | Number of SNPs detected only by NGS | Number of SNPs detected by both methods | Number of the consistent SNPs detected by both methods | Number of heterozygous SNPs detected by both methods |
|--------|--------|-----------------------------------------------------|-------------------------------------|-----------------------------------------|--------------------------------------------------------|------------------------------------------------------|
| F01    | Mother | 17                                                  | 9                                   | 98                                      | 96                                                     | 53                                                   |
|        | Father | 4                                                   | 11                                  | 90                                      | 87                                                     | 48                                                   |
| F02    | Mother | 19                                                  | 6                                   | 101                                     | 100                                                    | 59                                                   |
|        | Father | 18                                                  | 10                                  | 98                                      | 96                                                     | 53                                                   |
| F03    | Mother | 20                                                  | 10                                  | 118                                     | 117                                                    | 47                                                   |
|        | Father | 18                                                  | 1                                   | 50                                      | 49                                                     | 6                                                    |
| F04    | Mother | 17                                                  | 8                                   | 102                                     | 102                                                    | 100                                                  |
|        | Father | 29                                                  | 1                                   | 54                                      | 52                                                     | 40                                                   |
| F05    | Mother | 29                                                  | 5                                   | 60                                      | 58                                                     | 47                                                   |
|        | Father | 12                                                  | 1                                   | 7                                       | 5                                                      | 5                                                    |
| F06    | Mother | 19                                                  | 1                                   | 48                                      | 47                                                     | 6                                                    |
|        | Father | 17                                                  | 10                                  | 95                                      | 93                                                     | 50                                                   |
| F07    | Mother | 13                                                  | 7                                   | 58                                      | 58                                                     | 32                                                   |
|        | Father | 18                                                  | 10                                  | 94                                      | 94                                                     | 92                                                   |
| F08    | Mother | 18                                                  | 1                                   | 50                                      | 48                                                     | 5                                                    |
|        | Father | 24                                                  | 20                                  | 113                                     | 103                                                    | 39                                                   |
| F09    | Mother | 16                                                  | 1                                   | 49                                      | 47                                                     | 5                                                    |
|        | Father | 16                                                  | 11                                  | 97                                      | 96                                                     | 53                                                   |
| F10    | Mother | 17                                                  | 1                                   | 47                                      | 45                                                     | 4                                                    |
|        | Father | 16                                                  | 5                                   | 99                                      | 98                                                     | 56                                                   |
| F11    | Mother | 15                                                  | 11                                  | 122                                     | 119                                                    | 49                                                   |
|        | Father | 24                                                  | 12                                  | 101                                     | 98                                                     | 86                                                   |
| F12    | Mother | 19                                                  | 10                                  | 94                                      | 93                                                     | 51                                                   |
|        | Father | 11                                                  | 13                                  | 89                                      | 88                                                     | 6                                                    |
| F13    | Mother | 19                                                  | 14                                  | 104                                     | 103                                                    | 43                                                   |
|        | Father | 20                                                  | 11                                  | 119                                     | 118                                                    | 47                                                   |

Supplementary Table S5: Characteristic of plasma sequencing data.

| Family | Raw data (Mb) | Total reads | Coverage of target region (%) | Sequencing depth | Ratio of >100×Sequencing depth (%) | Fetal fraction (%) |
|--------|---------------|-------------|-------------------------------|------------------|------------------------------------|--------------------|
| F01    | 2245.57       | 15237739    | 99.47                         | 613.99           | 93.45                              | 12                 |
| F02    | 3142.48       | 21475586    | 99.47                         | 895.13           | 94.29                              | 20                 |
| F03    | 1527.16       | 10519074    | 96.87                         | 490.13           | 87.72                              | 17                 |
| F04    | 2085.37       | 14236162    | 99.45                         | 539.83           | 93.07                              | 13                 |
| F05    | 2509.49       | 17336363    | 99.39                         | 664.83           | 93.49                              | 18                 |
| F06    | 2485.34       | 17111470    | 99.48                         | 331.21           | 90.88                              | 20                 |
| F07    | 2500.62       | 17027931    | 99.34                         | 362.25           | 90.93                              | 14                 |
| F08    | 867.11        | 5780725     | 99.57                         | 321.43           | 90.19                              | 8                  |
| F09    | 2439.36       | 16636840    | 99.38                         | 670.89           | 93.78                              | 12                 |
| F10    | 2435          | 16550285    | 99.32                         | 339.39           | 90.80                              | 10                 |
| F11    | 2784.7        | 19127744    | 99.52                         | 416.39           | 92.01                              | 19                 |
| F12    | 834.36        | 5562430     | 99.54                         | 317.05           | 92.53                              | 9                  |
| F13    | 2479.48       | 16948623    | 99.39                         | 379.25           | 90.63                              | 11                 |

Supplementary Table S6: Determining the paternally and maternally inherited haplotype by RHDO analysis of 10 kb amplicons.

| Family |        |                    | Genomic location | Counts for the allele on Hap 0 | Counts for the allele on Hap 1 | Cumulative count for alleles on Hap 0 | Cumulative count for alleles on Hap 1 | Total no. of reads | Fraction of total reads contributed by Hap 0 alleles | Classification threshold (upper, lower) | SPRT classification result |
|--------|--------|--------------------|------------------|--------------------------------|--------------------------------|---------------------------------------|---------------------------------------|--------------------|------------------------------------------------------|-----------------------------------------|----------------------------|
| F01    | Father | type $\alpha$ SNPs | 5223970          | 890                            | 9                              | 890                                   | 9                                     | 899                | 0.9900                                               | (0.9835, 0.9872)                        | Hap 0                      |
|        |        |                    | 5228143          | 1013                           | 0                              | 1013                                  | 0                                     | 1013               | 1.0000                                               | (0.9837, 0.9870)                        | Hap 0                      |
|        |        |                    | 5228708          | 993                            | 3                              | 993                                   | 3                                     | 996                | 0.9970                                               | (0.9836, 0.9871)                        | Hap 0                      |
|        |        |                    | 5229196          | 884                            | 3                              | 884                                   | 3                                     | 887                | 0.9966                                               | (0.9834, 0.9873)                        | Hap 0                      |
|        |        |                    | 5233447          | 24                             | 0                              | 24                                    | 0                                     | 24                 | 1.0000                                               | (0.9143, 1.0564)                        | Unclassified               |
|        |        |                    | 5234781          | 148                            | 0                              | 172                                   | 0                                     | 172                | 1.0000                                               | (0.9754, 0.9953)                        | Hap 0                      |
|        |        |                    | 5236851          | 947                            | 2                              | 947                                   | 2                                     | 949                | 0.9979                                               | (0.9836, 0.9871)                        | Hap 0                      |
|        |        |                    | 5243559          | 89                             | 0                              | 89                                    | 0                                     | 89                 | 1.0000                                               | (0.9662, 1.0045)                        | Unclassified               |
|        |        |                    | 5243613          | 211                            | 0                              | 300                                   | 0                                     | 300                | 1.0000                                               | (0.9797, 0.9910)                        | Hap 0                      |
|        |        |                    | 5244404          | 572                            | 1                              | 572                                   | 1                                     | 573                | 0.9983                                               | (0.9824, 0.9883)                        | Hap 0                      |
|        |        |                    | 5246356          | 822                            | 1                              | 822                                   | 1                                     | 823                | 0.9988                                               | (0.9833, 0.9874)                        | Hap 0                      |
|        |        | type $\beta$ SNPs  | 5247992          | 45                             | 990                            | 45                                    | 990                                   | 1035               | 0.0435                                               | (0.0197, 0.0251)                        | Hap 0                      |
|        |        |                    | 5257189          | 47                             | 882                            | 47                                    | 882                                   | 929                | 0.0506                                               | (0.0194, 0.0254)                        | Hap 0                      |
|        |        |                    | 5259000          | 43                             | 1010                           | 43                                    | 1010                                  | 1053               | 0.0408                                               | (0.0197, 0.0250)                        | Hap 0                      |
|        | Mather | type $\alpha$ SNPs | 5229835          | 342                            | 300                            | 342                                   | 300                                   | 642                | 0.5327                                               | (0.4843, 0.5759)                        | Unclassified               |
|        |        |                    | 5237435          | 13                             | 11                             | 355                                   | 311                                   | 666                | 0.5330                                               | (0.4859, 0.5759)                        | Unclassified               |

|     |        |                          |         |      |     |      |      |      |         |                   |              |
|-----|--------|--------------------------|---------|------|-----|------|------|------|---------|-------------------|--------------|
|     |        |                          |         |      |     |      |      |      | 0.5742) |                   |              |
|     |        |                          | 5246514 | 471  | 331 | 826  | 642  | 1468 | 0.5627  | (0.5100, 0.5501)  | Hap 0        |
|     |        | type<br>$\beta$<br>SNPs  | 5223871 | 517  | 492 | 517  | 492  | 1009 | 0.5124  | (0.4408, 0.4991)  | Hap 0        |
|     |        |                          | 5224054 | 431  | 476 | 431  | 476  | 907  | 0.4752  | (0.4375, 0.5023)  | Unclassified |
|     |        |                          | 5226579 | 40   | 67  | 471  | 543  | 1014 | 0.4645  | (0.4409, 0.4989)  | Unclassified |
|     |        |                          | 5227471 | 355  | 360 | 826  | 903  | 1729 | 0.4777  | (0.4529, 0.4869)  | Unclassified |
|     |        |                          | 5229010 | 482  | 459 | 1308 | 1362 | 2670 | 0.4899  | (0.4589, 0.4809)  | Hap 0        |
|     |        |                          | 5232212 | 35   | 48  | 35   | 48   | 83   | 0.4217  | (0.1157, 0.8241)  | Unclassified |
|     |        |                          | 5233697 | 134  | 104 | 169  | 152  | 321  | 0.5265  | (0.3783, 0.5615)  | Unclassified |
|     |        |                          | 5233836 | 364  | 335 | 533  | 487  | 1020 | 0.5225  | (0.4411, 0.4988)  | Hap 0        |
|     |        |                          | 5234029 | 9    | 10  | 9    | 10   | 19   | 0.4737  | (-1.0774, 2.0173) | Unclassified |
|     |        |                          | 5234542 | 25   | 37  | 34   | 47   | 81   | 0.4198  | (0.1070, 0.8329)  | Unclassified |
|     |        |                          | 5236740 | 271  | 275 | 305  | 322  | 627  | 0.4864  | (0.4230, 0.5168)  | Unclassified |
|     |        |                          | 5237284 | 117  | 145 | 422  | 467  | 889  | 0.4747  | (0.4369, 0.5030)  | Unclassified |
|     |        |                          | 5244144 | 398  | 393 | 820  | 860  | 1680 | 0.4881  | (0.4524, 0.4874)  | Hap 0        |
|     |        |                          | 5246000 | 408  | 368 | 408  | 368  | 776  | 0.5258  | (0.4320, 0.5078)  | Hap 0        |
|     |        |                          | 5246203 | 394  | 324 | 394  | 324  | 718  | 0.5487  | (0.4290, 0.5109)  | Hap 0        |
|     |        |                          | 5247153 | 338  | 387 | 338  | 387  | 725  | 0.4662  | (0.4294, 0.5105)  | Unclassified |
|     |        |                          | 5247733 | 439  | 464 | 777  | 851  | 1628 | 0.4773  | (0.4519, 0.4880)  | Unclassified |
| F02 | Father | type<br>$\alpha$<br>SNPs | 5229835 | 897  | 4   | 897  | 4    | 901  | 0.9956  | (0.9762, 0.9795)  | Hap 0        |
|     |        |                          | 5237435 | 14   | 0   | 14   | 0    | 14   | 1.0000  | (0.8703, 1.0854)  | Unclassified |
|     |        |                          | 5246514 | 1361 | 2   | 1375 | 2    | 1377 | 0.9985  | (0.9767,          | Hap 0        |



|  |        |                          |         |     |      |     |      |      |        |                      |              |
|--|--------|--------------------------|---------|-----|------|-----|------|------|--------|----------------------|--------------|
|  |        |                          |         |     |      |     |      |      |        | 0.9789)              |              |
|  |        | type<br>$\beta$<br>SNPs  | 5224054 | 140 | 1206 | 140 | 1206 | 1346 | 0.1040 | (0.0307,<br>0.0341)  | Hap 0        |
|  |        |                          | 5226579 | 2   | 73   | 2   | 73   | 75   | 0.0267 | (0.0019,<br>0.0629)  | Unclassified |
|  |        |                          | 5227471 | 97  | 842  | 99  | 915  | 1014 | 0.0976 | (0.0302,<br>0.0347)  | Hap 0        |
|  |        |                          | 5229010 | 152 | 1437 | 152 | 1437 | 1589 | 0.0957 | (0.0310,<br>0.0339)  | Hap 0        |
|  |        |                          | 5232212 | 3   | 88   | 3   | 88   | 91   | 0.0330 | (0.0072,<br>0.0576)  | Unclassified |
|  |        |                          | 5233697 | 25  | 298  | 28  | 386  | 414  | 0.0676 | (0.0269,<br>0.0379)  | Hap 0        |
|  |        |                          | 5233836 | 126 | 944  | 126 | 944  | 1070 | 0.1178 | (0.0303,<br>0.0346)  | Hap 0        |
|  |        |                          | 5234029 | 1   | 22   | 1   | 22   | 23   | 0.0435 | (-0.0672,<br>0.1320) | Unclassified |
|  |        |                          | 5234542 | 3   | 61   | 4   | 83   | 87   | 0.0460 | (0.0061,<br>0.0587)  | Unclassified |
|  |        |                          | 5236740 | 62  | 663  | 66  | 746  | 812  | 0.0813 | (0.0296,<br>0.0352)  | Hap 0        |
|  |        |                          | 5237284 | 29  | 299  | 29  | 299  | 328  | 0.0884 | (0.0254,<br>0.0394)  | Hap 0        |
|  |        |                          | 5244144 | 70  | 938  | 70  | 938  | 1008 | 0.0694 | (0.0301,<br>0.0347)  | Hap 0        |
|  |        |                          | 5246000 | 138 | 1350 | 138 | 1350 | 1488 | 0.0927 | (0.0309,<br>0.0340)  | Hap 0        |
|  |        |                          | 5246203 | 139 | 1135 | 139 | 1135 | 1274 | 0.1091 | (0.0306,<br>0.0342)  | Hap 0        |
|  |        |                          | 5247153 | 94  | 962  | 94  | 962  | 1056 | 0.0890 | (0.0302,<br>0.0346)  | Hap 0        |
|  |        |                          | 5247733 | 165 | 1454 | 165 | 1454 | 1619 | 0.1019 | (0.0310,<br>0.0338)  | Hap 0        |
|  | Mather | type<br>$\alpha$<br>SNPs | 5228143 | 845 | 533  | 845 | 533  | 1378 | 0.6132 | (0.5377,<br>0.5630)  | Hap 0        |
|  |        |                          | 5228708 | 922 | 559  | 922 | 559  | 1481 | 0.6226 | (0.5385,<br>0.5621)  | Hap 0        |
|  |        |                          | 5229196 | 728 | 434  | 728 | 434  | 1162 | 0.6265 | (0.5353,<br>0.5654)  | Hap 0        |
|  |        |                          | 5233447 | 6   | 4    | 6   | 4    | 10   | 0.6000 | (-1.1983,<br>2.2990) | Unclassified |
|  |        |                          | 5234781 | 133 | 88   | 139 | 92   | 231  | 0.6017 | (0.4746,             | Unclassified |

|     |        |                    |         |     |     |     |     |      |         |                  |              |
|-----|--------|--------------------|---------|-----|-----|-----|-----|------|---------|------------------|--------------|
|     |        |                    |         |     |     |     |     |      | 0.6260) |                  |              |
|     |        |                    | 5236851 | 822 | 558 | 961 | 650 | 1611 | 0.5965  | (0.5395, 0.5612) | Hap 0        |
|     |        |                    | 5243559 | 67  | 45  | 67  | 45  | 112  | 0.5982  | (0.3942, 0.7065) | Unclassified |
|     |        |                    | 5243613 | 142 | 116 | 209 | 161 | 370  | 0.5649  | (0.5031, 0.5976) | Unclassified |
|     |        |                    | 5244383 | 464 | 264 | 673 | 425 | 1098 | 0.6129  | (0.5344, 0.5663) | Hap 0        |
|     |        |                    | 5244404 | 427 | 237 | 427 | 237 | 664  | 0.6431  | (0.5240, 0.5767) | Hap 0        |
|     |        |                    | 5246356 | 947 | 513 | 947 | 513 | 1460 | 0.6486  | (0.5384, 0.5623) | Hap 0        |
|     |        |                    | 5248852 | 328 | 48  | 328 | 48  | 376  | 0.8723  | (0.5038, 0.5968) | Hap 0        |
|     |        | type $\beta$ SNPs  | 5248200 | 726 | 777 | 726 | 777 | 1503 | 0.4830  | (0.4380, 0.4613) | Hap 0        |
|     |        |                    | 5248770 | 517 | 331 | 517 | 331 | 848  | 0.6097  | (0.4290, 0.4703) | Hap 0        |
|     |        |                    | 5248842 | 286 | 54  | 286 | 54  | 340  | 0.8412  | (0.3982, 0.5011) | Hap 0        |
| F03 | Father | type $\beta$ SNPs  | 5247992 | 86  | 616 | 86  | 616 | 702  | 0.1225  | (0.0253, 0.0322) | Hap 0        |
|     |        |                    | 5257189 | 52  | 326 | 52  | 326 | 378  | 0.1376  | (0.0223, 0.0352) | Hap 0        |
|     |        |                    | 5259000 | 41  | 399 | 41  | 399 | 440  | 0.0932  | (0.0232, 0.0343) | Hap 0        |
|     | Mather | type $\alpha$ SNPs | 5223970 | 203 | 80  | 203 | 80  | 283  | 0.7173  | (0.4697, 0.6157) | Hap 0        |
|     |        |                    | 5228708 | 235 | 148 | 235 | 148 | 383  | 0.6136  | (0.4888, 0.5966) | Hap 0        |
|     |        |                    | 5229196 | 210 | 101 | 210 | 101 | 311  | 0.6752  | (0.4763, 0.6091) | Hap 0        |
|     |        |                    | 5236851 | 216 | 102 | 216 | 102 | 318  | 0.6792  | (0.4778, 0.6076) | Hap 0        |
|     |        |                    | 5243613 | 34  | 13  | 34  | 13  | 47   | 0.7234  | (0.1033, 0.9821) | Unclassified |
|     |        |                    | 5244404 | 126 | 58  | 160 | 71  | 231  | 0.6926  | (0.4533, 0.6321) | Hap 0        |
|     |        |                    | 5246356 | 232 | 98  | 232 | 98  | 330  | 0.7030  | (0.4801, 0.6053) | Hap 0        |

|     |        |                          |         |     |     |     |     |      |        |                     |              |
|-----|--------|--------------------------|---------|-----|-----|-----|-----|------|--------|---------------------|--------------|
|     |        | type<br>$\beta$<br>SNPs  | 5223871 | 161 | 225 | 161 | 225 | 386  | 0.4171 | (0.4038,<br>0.5108) | Unclassified |
|     |        |                          | 5224054 | 137 | 190 | 298 | 415 | 713  | 0.4180 | (0.4283,<br>0.4863) | Hap 1        |
|     |        |                          | 5227471 | 104 | 114 | 104 | 114 | 218  | 0.4771 | (0.3626,<br>0.5520) | Unclassified |
|     |        |                          | 5229010 | 215 | 230 | 319 | 344 | 663  | 0.4811 | (0.4261,<br>0.4884) | Unclassified |
|     |        |                          | 5233697 | 16  | 24  | 335 | 368 | 703  | 0.4765 | (0.4279,<br>0.4867) | Unclassified |
|     |        |                          | 5233836 | 122 | 154 | 457 | 522 | 979  | 0.4668 | (0.4362,<br>0.4784) | Unclassified |
|     |        |                          | 5234542 | 4   | 6   | 461 | 528 | 989  | 0.4661 | (0.4364,<br>0.4782) | Unclassified |
|     |        |                          | 5236740 | 96  | 89  | 557 | 617 | 1174 | 0.4744 | (0.4397,<br>0.4749) | Unclassified |
|     |        |                          | 5237284 | 38  | 18  | 595 | 635 | 1230 | 0.4837 | (0.4405,<br>0.4741) | Hap 0        |
|     |        |                          | 5244144 | 102 | 111 | 102 | 111 | 213  | 0.4789 | (0.3603,<br>0.5542) | Unclassified |
|     |        |                          | 5246000 | 209 | 213 | 311 | 324 | 635  | 0.4898 | (0.4248,<br>0.4898) | Unclassified |
|     |        |                          | 5246203 | 149 | 179 | 460 | 503 | 963  | 0.4777 | (0.4358,<br>0.4787) | Unclassified |
|     |        |                          | 5247153 | 143 | 136 | 603 | 639 | 1242 | 0.4855 | (0.4407,<br>0.4739) | Hap 0        |
|     |        |                          | 5247733 | 205 | 232 | 205 | 232 | 437  | 0.4691 | (0.4100,<br>0.5045) | Unclassified |
| F04 | Father | type<br>$\alpha$<br>SNPs | 5255989 | 818 | 0   | 818 | 0   | 818  | 1.0000 | (0.9823,<br>0.9864) | Hap 0        |
|     |        |                          | 5257778 | 837 | 0   | 837 | 0   | 837  | 1.0000 | (0.9824,<br>0.9864) | Hap 0        |
|     |        |                          | 5263683 | 636 | 0   | 636 | 0   | 636  | 1.0000 | (0.9818,<br>0.9870) | Hap 0        |
|     |        |                          | 5264146 | 903 | 2   | 903 | 2   | 905  | 0.9978 | (0.9825,<br>0.9862) | Hap 0        |
|     |        |                          | 5265106 | 826 | 0   | 826 | 0   | 826  | 1.0000 | (0.9824,<br>0.9864) | Hap 0        |
|     |        |                          | 5265680 | 406 | 0   | 406 | 0   | 406  | 1.0000 | (0.9803,<br>0.9885) | Hap 0        |
|     |        |                          | 5269931 | 690 | 1   | 690 | 1   | 691  | 0.9986 | (0.9820,<br>0.9868) | Hap 0        |

|  |        |                    |         |     |     |      |      |      |        |                  |              |
|--|--------|--------------------|---------|-----|-----|------|------|------|--------|------------------|--------------|
|  |        |                    | 5271671 | 867 | 4   | 867  | 4    | 871  | 0.9954 | (0.9825, 0.9863) | Hap 0        |
|  |        | type $\beta$ SNPs  | 5248200 | 42  | 800 | 42   | 800  | 842  | 0.0499 | (0.0205, 0.0269) | Hap 0        |
|  |        |                    | 5248842 | 20  | 136 | 20   | 136  | 156  | 0.1282 | (0.0064, 0.0410) | Hap 0        |
|  | Mather | type $\alpha$ SNPs | 5223920 | 406 | 300 | 406  | 300  | 706  | 0.5751 | (0.4942, 0.5710) | Hap 0        |
|  |        |                    | 5223970 | 377 | 256 | 377  | 256  | 633  | 0.5956 | (0.4898, 0.5754) | Hap 0        |
|  |        |                    | 5224660 | 369 | 295 | 369  | 295  | 664  | 0.5557 | (0.4918, 0.5734) | Unclassified |
|  |        |                    | 5227950 | 327 | 214 | 696  | 509  | 1205 | 0.5776 | (0.5101, 0.5551) | Hap 0        |
|  |        |                    | 5227975 | 326 | 214 | 326  | 214  | 540  | 0.6037 | (0.4824, 0.5828) | Hap 0        |
|  |        |                    | 5228143 | 458 | 398 | 458  | 398  | 856  | 0.5350 | (0.5009, 0.5643) | Unclassified |
|  |        |                    | 5228708 | 457 | 377 | 915  | 775  | 1690 | 0.5414 | (0.5165, 0.5486) | Unclassified |
|  |        |                    | 5229196 | 481 | 336 | 1396 | 1111 | 2507 | 0.5568 | (0.5218, 0.5434) | Hap 0        |
|  |        |                    | 5229743 | 409 | 156 | 409  | 156  | 565  | 0.7239 | (0.4846, 0.5806) | Hap 0        |
|  |        |                    | 5229745 | 410 | 151 | 410  | 151  | 561  | 0.7308 | (0.4843, 0.5809) | Hap 0        |
|  |        |                    | 5231897 | 515 | 377 | 515  | 377  | 892  | 0.5774 | (0.5022, 0.5630) | Hap 0        |
|  |        |                    | 5232146 | 37  | 28  | 37   | 28   | 65   | 0.5692 | (0.1154, 0.9497) | Unclassified |
|  |        |                    | 5232573 | 425 | 344 | 462  | 372  | 834  | 0.5540 | (0.5001, 0.5651) | Unclassified |
|  |        |                    | 5233447 | 12  | 10  | 474  | 382  | 856  | 0.5537 | (0.5009, 0.5643) | Unclassified |
|  |        |                    | 5233643 | 29  | 28  | 503  | 410  | 913  | 0.5509 | (0.5029, 0.5623) | Unclassified |
|  |        |                    | 5234587 | 61  | 28  | 564  | 438  | 1002 | 0.5629 | (0.5055, 0.5597) | Hap 0        |
|  |        |                    | 5234781 | 102 | 77  | 102  | 77   | 179  | 0.5698 | (0.3811, 0.6841) | Unclassified |
|  |        |                    | 5236417 | 526 | 403 | 628  | 480  | 1108 | 0.5668 | (0.5081, 0.5571) | Hap 0        |

|  |  |                         |         |     |     |      |      |      |        |                  |              |
|--|--|-------------------------|---------|-----|-----|------|------|------|--------|------------------|--------------|
|  |  |                         | 5236851 | 475 | 369 | 475  | 369  | 844  | 0.5628 | (0.5005, 0.5647) | Unclassified |
|  |  |                         | 5243559 | 48  | 44  | 523  | 413  | 936  | 0.5588 | (0.5036, 0.5616) | Unclassified |
|  |  |                         | 5243613 | 95  | 104 | 618  | 517  | 1135 | 0.5445 | (0.5087, 0.5565) | Unclassified |
|  |  |                         | 5243757 | 361 | 309 | 979  | 826  | 1805 | 0.5424 | (0.5176, 0.5476) | Unclassified |
|  |  |                         | 5244299 | 209 | 161 | 1188 | 987  | 2175 | 0.5462 | (0.5201, 0.5451) | Hap 0        |
|  |  |                         | 5244404 | 284 | 179 | 284  | 179  | 463  | 0.6134 | (0.4740, 0.5912) | Hap 0        |
|  |  |                         | 5245507 | 346 | 273 | 346  | 273  | 619  | 0.5590 | (0.4888, 0.5764) | Unclassified |
|  |  |                         | 5246042 | 416 | 323 | 762  | 596  | 1358 | 0.5611 | (0.5126, 0.5526) | Hap 0        |
|  |  |                         | 5246356 | 532 | 342 | 532  | 342  | 874  | 0.6087 | (0.5016, 0.5636) | Hap 0        |
|  |  |                         | 5246512 | 368 | 338 | 368  | 338  | 706  | 0.5212 | (0.4942, 0.5710) | Unclassified |
|  |  |                         | 5247141 | 362 | 280 | 730  | 618  | 1348 | 0.5415 | (0.5125, 0.5527) | Unclassified |
|  |  |                         | 5247791 | 512 | 480 | 1242 | 1098 | 2340 | 0.5308 | (0.5210, 0.5442) | Unclassified |
|  |  |                         | 5248243 | 403 | 376 | 1645 | 1474 | 3119 | 0.5274 | (0.5239, 0.5413) | Unclassified |
|  |  |                         | 5248641 | 416 | 347 | 2061 | 1821 | 3882 | 0.5309 | (0.5256, 0.5396) | Unclassified |
|  |  |                         | 5248770 | 257 | 205 | 2318 | 2026 | 4344 | 0.5336 | (0.5264, 0.5388) | Unclassified |
|  |  |                         | 5248852 | 170 | 96  | 2488 | 2122 | 4610 | 0.5397 | (0.5267, 0.5385) | Hap 0        |
|  |  |                         | 5249715 | 351 | 154 | 351  | 154  | 505  | 0.6950 | (0.4789, 0.5863) | Hap 0        |
|  |  |                         | 5257189 | 455 | 359 | 455  | 359  | 814  | 0.5590 | (0.4993, 0.5659) | Unclassified |
|  |  |                         | 5259000 | 499 | 305 | 954  | 664  | 1618 | 0.5896 | (0.5158, 0.5494) | Hap 0        |
|  |  |                         | 5265941 | 436 | 324 | 436  | 324  | 760  | 0.5737 | (0.4969, 0.5683) | Hap 0        |
|  |  | type<br>$\beta$<br>SNPs | 5248329 | 400 | 431 | 400  | 431  | 831  | 0.4813 | (0.4348, 0.5000) | Unclassified |
|  |  |                         | 5249370 | 309 | 354 | 709  | 785  | 1494 | 0.4746 | (0.4493,         | Unclassified |

|     |        |                    |         |     |     |      |      |      |         |                   |              |
|-----|--------|--------------------|---------|-----|-----|------|------|------|---------|-------------------|--------------|
|     |        |                    |         |     |     |      |      |      | 0.4856) |                   |              |
|     |        |                    | 5256431 | 365 | 318 | 1074 | 1103 | 2177 | 0.4933  | (0.4550, 0.4799)  | Hap 0        |
|     |        |                    | 5259534 | 39  | 15  | 39   | 15   | 54   | 0.7222  | (-0.0347, 0.9695) | Unclassified |
|     |        |                    | 5262782 | 438 | 469 | 477  | 484  | 961  | 0.4964  | (0.4392, 0.4956)  | Hap 0        |
|     |        |                    | 5263577 | 390 | 408 | 390  | 408  | 798  | 0.4887  | (0.4334, 0.5014)  | Unclassified |
|     |        |                    | 5264929 | 437 | 312 | 827  | 720  | 1547 | 0.5346  | (0.4499, 0.4849)  | Hap 0        |
|     |        |                    | 5265366 | 66  | 52  | 66   | 52   | 118  | 0.5593  | (0.2376, 0.6972)  | Unclassified |
|     |        |                    | 5265475 | 8   | 4   | 74   | 56   | 130  | 0.5692  | (0.2588, 0.6760)  | Unclassified |
|     |        |                    | 5266961 | 378 | 368 | 452  | 424  | 876  | 0.5160  | (0.4365, 0.4984)  | Hap 0        |
|     |        |                    | 5269140 | 593 | 512 | 593  | 512  | 1105 | 0.5367  | (0.4429, 0.4919)  | Hap 0        |
|     |        |                    | 5269799 | 292 | 295 | 292  | 295  | 587  | 0.4974  | (0.4212, 0.5136)  | Unclassified |
|     |        |                    | 5270418 | 477 | 419 | 769  | 714  | 1483 | 0.5185  | (0.4491, 0.4857)  | Hap 0        |
| F05 | Father | type $\alpha$ SNPs | 5255044 | 544 | 1   | 544  | 1    | 545  | 0.9982  | (0.9769, 0.9825)  | Hap 0        |
|     |        | type $\beta$ SNPs  | 5248329 | 106 | 835 | 106  | 835  | 941  | 0.1126  | (0.0274, 0.0325)  | Hap 0        |
|     |        |                    | 5249004 | 73  | 709 | 73   | 709  | 782  | 0.0934  | (0.0269, 0.0330)  | Hap 0        |
|     | Mather | type $\alpha$ SNPs | 5223871 | 559 | 502 | 559  | 502  | 1061 | 0.5269  | (0.5269, 0.5636)  | Hap 1        |
|     |        |                    | 5231897 | 518 | 523 | 518  | 523  | 1041 | 0.4976  | (0.5265, 0.5640)  | Hap 1        |
|     |        |                    | 5232212 | 38  | 17  | 38   | 17   | 55   | 0.6909  | (0.1911, 0.8994)  | Unclassified |
|     |        |                    | 5232573 | 503 | 482 | 541  | 499  | 1040 | 0.5202  | (0.5265, 0.5640)  | Hap 1        |
|     |        |                    | 5233643 | 28  | 31  | 28   | 31   | 59   | 0.4746  | (0.2151, 0.8754)  | Unclassified |
|     |        |                    | 5233697 | 120 | 131 | 148  | 162  | 310  | 0.4774  | (0.4824, 0.6081)  | Hap 1        |

|  |  |                         |         |     |     |     |     |      |        |                   |              |
|--|--|-------------------------|---------|-----|-----|-----|-----|------|--------|-------------------|--------------|
|  |  |                         | 5234029 | 6   | 6   | 6   | 6   | 12   | 0.5000 | (-1.0781, 2.1686) | Unclassified |
|  |  |                         | 5234542 | 27  | 29  | 33  | 35  | 68   | 0.4853 | (0.2588, 0.8317)  | Unclassified |
|  |  |                         | 5234587 | 45  | 41  | 78  | 76  | 154  | 0.5065 | (0.4188, 0.6717)  | Unclassified |
|  |  |                         | 5243856 | 465 | 412 | 543 | 488 | 1031 | 0.5267 | (0.5264, 0.5641)  | Unclassified |
|  |  |                         | 5257778 | 450 | 507 | 993 | 995 | 1988 | 0.4995 | (0.5354, 0.5550)  | Hap 1        |
|  |  |                         | 5263683 | 452 | 370 | 452 | 370 | 822  | 0.5499 | (0.5215, 0.5689)  | Unclassified |
|  |  |                         | 5264146 | 511 | 471 | 963 | 841 | 1804 | 0.5338 | (0.5344, 0.5560)  | Hap 1        |
|  |  |                         | 5265106 | 511 | 531 | 511 | 531 | 1042 | 0.4904 | (0.5266, 0.5639)  | Hap 1        |
|  |  |                         | 5265680 | 254 | 253 | 254 | 253 | 507  | 0.5010 | (0.5068, 0.5837)  | Hap 1        |
|  |  |                         | 5269931 | 420 | 305 | 420 | 305 | 725  | 0.5793 | (0.5184, 0.5721)  | Hap 0        |
|  |  |                         | 5271671 | 563 | 472 | 563 | 472 | 1035 | 0.5440 | (0.5264, 0.5641)  | Unclassified |
|  |  | type<br>$\beta$<br>SNPs | 5247992 | 383 | 745 | 383 | 745 | 1128 | 0.3395 | (0.4375, 0.4720)  | Hap 1        |
|  |  |                         | 5250168 | 302 | 377 | 302 | 377 | 679  | 0.4448 | (0.4261, 0.4834)  | Unclassified |
|  |  |                         | 5252251 | 222 | 423 | 524 | 800 | 1324 | 0.3958 | (0.4400, 0.4695)  | Hap 1        |
|  |  |                         | 5253477 | 208 | 376 | 208 | 376 | 584  | 0.3562 | (0.4214, 0.4881)  | Hap 1        |
|  |  |                         | 5255912 | 288 | 421 | 288 | 421 | 709  | 0.4062 | (0.4273, 0.4822)  | Hap 1        |
|  |  |                         | 5256647 | 249 | 394 | 249 | 394 | 643  | 0.3872 | (0.4245, 0.4850)  | Hap 1        |
|  |  |                         | 5258038 | 307 | 485 | 307 | 485 | 792  | 0.3876 | (0.4302, 0.4793)  | Hap 1        |
|  |  |                         | 5258162 | 197 | 344 | 197 | 344 | 541  | 0.3641 | (0.4187, 0.4908)  | Hap 1        |
|  |  |                         | 5258265 | 33  | 79  | 33  | 79  | 112  | 0.2946 | (0.2808, 0.6287)  | Unclassified |
|  |  |                         | 5258429 | 136 | 250 | 169 | 329 | 498  | 0.3394 | (0.4156, 0.4939)  | Hap 1        |
|  |  |                         | 5258490 | 199 | 450 | 199 | 450 | 649  | 0.3066 | (0.4247, 0.4939)  | Hap 1        |

|  |  |  |         |     |     |     |      |      |        |                     |              |
|--|--|--|---------|-----|-----|-----|------|------|--------|---------------------|--------------|
|  |  |  |         |     |     |     |      |      |        | 0.4848)             |              |
|  |  |  | 5258592 | 367 | 639 | 367 | 639  | 1006 | 0.3648 | (0.4354,<br>0.4741) | Hap 1        |
|  |  |  | 5258827 | 393 | 637 | 393 | 637  | 1030 | 0.3816 | (0.4358,<br>0.4737) | Hap 1        |
|  |  |  | 5258852 | 418 | 670 | 418 | 670  | 1088 | 0.3842 | (0.4368,<br>0.4727) | Hap 1        |
|  |  |  | 5258856 | 415 | 673 | 415 | 673  | 1088 | 0.3814 | (0.4368,<br>0.4727) | Hap 1        |
|  |  |  | 5258989 | 345 | 593 | 345 | 593  | 938  | 0.3678 | (0.4340,<br>0.4755) | Hap 1        |
|  |  |  | 5259103 | 352 | 666 | 352 | 666  | 1018 | 0.3458 | (0.4356,<br>0.4739) | Hap 1        |
|  |  |  | 5259289 | 157 | 281 | 157 | 281  | 438  | 0.3584 | (0.4103,<br>0.4992) | Hap 1        |
|  |  |  | 5259292 | 155 | 276 | 155 | 276  | 431  | 0.3596 | (0.4096,<br>0.5000) | Hap 1        |
|  |  |  | 5259419 | 22  | 40  | 22  | 40   | 62   | 0.3548 | (0.1406,<br>0.7689) | Unclassified |
|  |  |  | 5259727 | 320 | 405 | 342 | 445  | 787  | 0.4346 | (0.4300,<br>0.4795) | Unclassified |
|  |  |  | 5260458 | 363 | 604 | 705 | 1049 | 1754 | 0.4019 | (0.4436,<br>0.4659) | Hap 1        |
|  |  |  | 5260576 | 364 | 559 | 364 | 559  | 923  | 0.3944 | (0.4336,<br>0.4759) | Hap 1        |
|  |  |  | 5261239 | 413 | 601 | 413 | 601  | 1014 | 0.4073 | (0.4355,<br>0.4740) | Hap 1        |
|  |  |  | 5266728 | 395 | 608 | 395 | 608  | 1003 | 0.3938 | (0.4353,<br>0.4742) | Hap 1        |
|  |  |  | 5268406 | 377 | 593 | 377 | 593  | 970  | 0.3887 | (0.4347,<br>0.4748) | Hap 1        |
|  |  |  | 5268622 | 398 | 623 | 398 | 623  | 1021 | 0.3898 | (0.4357,<br>0.4738) | Hap 1        |
|  |  |  | 5268797 | 430 | 607 | 430 | 607  | 1037 | 0.4147 | (0.4360,<br>0.4735) | Hap 1        |
|  |  |  | 5269343 | 460 | 734 | 460 | 734  | 1194 | 0.3853 | (0.4384,<br>0.4711) | Hap 1        |
|  |  |  | 5269806 | 264 | 407 | 264 | 407  | 671  | 0.3934 | (0.4257,<br>0.4838) | Hap 1        |
|  |  |  | 5270246 | 399 | 405 | 399 | 405  | 804  | 0.4963 | (0.4305,<br>0.4790) | Hap 0        |
|  |  |  | 5270343 | 380 | 177 | 380 | 177  | 557  | 0.6822 | (0.4198,<br>0.4897) | Hap 0        |



|     |        |                    |         |     |     |     |     |      |        |                   |              |
|-----|--------|--------------------|---------|-----|-----|-----|-----|------|--------|-------------------|--------------|
|     |        |                    | 5272154 | 461 | 742 | 461 | 742 | 1203 | 0.3832 | (0.4386, 0.4709)  | Hap 1        |
| F06 | Father | type $\alpha$ SNPs | 5229835 | 147 | 0   | 147 | 0   | 147  | 1.0000 | (0.9700, 0.9912)  | Hap 0        |
|     |        |                    | 5237435 | 25  | 0   | 25  | 0   | 25   | 1.0000 | (0.9180, 1.0432)  | Unclassified |
|     |        |                    | 5246514 | 418 | 0   | 443 | 0   | 443  | 1.0000 | (0.9771, 0.9841)  | Hap 0        |
|     |        | type $\beta$ SNPs  | 5223750 | 6   | 192 | 6   | 192 | 198  | 0.0303 | (0.0165, 0.0410)  | Unclassified |
|     |        |                    | 5223871 | 17  | 282 | 23  | 474 | 497  | 0.0463 | (0.0239, 0.0336)  | Hap 0        |
|     |        |                    | 5224054 | 4   | 188 | 4   | 188 | 192  | 0.0208 | (0.0161, 0.0414)  | Unclassified |
|     |        |                    | 5224660 | 7   | 239 | 11  | 427 | 438  | 0.0251 | (0.0232, 0.0343)  | Unclassified |
|     |        |                    | 5226579 | 0   | 11  | 11  | 438 | 449  | 0.0245 | (0.0233, 0.0342)  | Unclassified |
|     |        |                    | 5227471 | 15  | 197 | 26  | 635 | 661  | 0.0393 | (0.0251, 0.0324)  | Hap 0        |
|     |        |                    | 5227950 | 3   | 135 | 3   | 135 | 138  | 0.0217 | (0.0111, 0.0464)  | Unclassified |
|     |        |                    | 5227975 | 5   | 148 | 8   | 283 | 291  | 0.0275 | (0.0204, 0.0371)  | Unclassified |
|     |        |                    | 5229010 | 29  | 348 | 37  | 631 | 668  | 0.0554 | (0.0251, 0.0324)  | Hap 0        |
|     |        |                    | 5229743 | 11  | 244 | 11  | 244 | 255  | 0.0431 | (0.0192, 0.0383)  | Hap 0        |
|     |        |                    | 5229745 | 10  | 248 | 10  | 248 | 258  | 0.0388 | (0.0193, 0.0382)  | Hap 0        |
|     |        |                    | 5230302 | 23  | 442 | 23  | 442 | 465  | 0.0495 | (0.0235, 0.0340)  | Hap 0        |
|     |        |                    | 5231897 | 29  | 471 | 29  | 471 | 500  | 0.0580 | (0.0239, 0.0336)  | Hap 0        |
|     |        |                    | 5232146 | 2   | 67  | 2   | 67  | 69   | 0.0290 | (-0.0065, 0.0640) | Unclassified |
|     |        |                    | 5232212 | 3   | 72  | 5   | 139 | 144  | 0.0347 | (0.0119, 0.0456)  | Unclassified |
|     |        |                    | 5232573 | 27  | 322 | 32  | 461 | 493  | 0.0649 | (0.0238, 0.0337)  | Hap 0        |
|     |        |                    | 5233643 | 13  | 209 | 13  | 209 | 222  | 0.0586 | (0.0178, 0.0397)  | Hap 0        |

|  |  |  |         |    |     |    |     |     |        |                   |              |
|--|--|--|---------|----|-----|----|-----|-----|--------|-------------------|--------------|
|  |  |  | 5233697 | 11 | 314 | 11 | 314 | 325 | 0.0338 | (0.0213, 0.0362)  | Unclassified |
|  |  |  | 5233836 | 32 | 398 | 43 | 712 | 755 | 0.0570 | (0.0255, 0.0320)  | Hap 0        |
|  |  |  | 5234029 | 28 | 421 | 28 | 421 | 449 | 0.0624 | (0.0233, 0.0342)  | Hap 0        |
|  |  |  | 5234542 | 0  | 21  | 0  | 21  | 21  | 0.0000 | (-0.0870, 0.1445) | Unclassified |
|  |  |  | 5234587 | 0  | 13  | 0  | 34  | 34  | 0.0000 | (-0.0427, 0.1002) | Unclassified |
|  |  |  | 5236417 | 24 | 424 | 24 | 458 | 482 | 0.0498 | (0.0237, 0.0338)  | Hap 0        |
|  |  |  | 5236740 | 29 | 381 | 29 | 381 | 410 | 0.0707 | (0.0228, 0.0347)  | Hap 0        |
|  |  |  | 5237284 | 6  | 159 | 6  | 159 | 165 | 0.0364 | (0.0140, 0.0435)  | Unclassified |
|  |  |  | 5237498 | 0  | 14  | 6  | 173 | 179 | 0.0335 | (0.0152, 0.0423)  | Unclassified |
|  |  |  | 5243757 | 14 | 209 | 20 | 382 | 402 | 0.0498 | (0.0227, 0.0348)  | Hap 0        |
|  |  |  | 5244144 | 6  | 125 | 6  | 125 | 131 | 0.0458 | (0.0102, 0.0473)  | Unclassified |
|  |  |  | 5244299 | 9  | 81  | 15 | 206 | 221 | 0.0679 | (0.0178, 0.0397)  | Hap 0        |
|  |  |  | 5245507 | 12 | 140 | 12 | 140 | 152 | 0.0789 | (0.0128, 0.0447)  | Hap 0        |
|  |  |  | 5246000 | 30 | 303 | 30 | 303 | 333 | 0.0901 | (0.0214, 0.0360)  | Hap 0        |
|  |  |  | 5246042 | 26 | 334 | 26 | 334 | 360 | 0.0722 | (0.0220, 0.0355)  | Hap 0        |
|  |  |  | 5246203 | 52 | 408 | 52 | 408 | 460 | 0.1130 | (0.0235, 0.0340)  | Hap 0        |
|  |  |  | 5246512 | 35 | 388 | 35 | 388 | 423 | 0.0827 | (0.0230, 0.0345)  | Hap 0        |
|  |  |  | 5247141 | 21 | 242 | 21 | 242 | 263 | 0.0798 | (0.0195, 0.0380)  | Hap 0        |
|  |  |  | 5247153 | 21 | 226 | 21 | 226 | 247 | 0.0850 | (0.0189, 0.0386)  | Hap 0        |
|  |  |  | 5247733 | 28 | 338 | 28 | 338 | 366 | 0.0765 | (0.0221, 0.0354)  | Hap 0        |
|  |  |  | 5247791 | 27 | 459 | 27 | 459 | 486 | 0.0556 | (0.0237, 0.0337)  | Hap 0        |
|  |  |  | 5248243 | 35 | 406 | 35 | 406 | 441 | 0.0794 | (0.0232, 0.0343)  | Hap 0        |

|     |        |                    |         |     |     |     |     |     |        |                  |              |
|-----|--------|--------------------|---------|-----|-----|-----|-----|-----|--------|------------------|--------------|
|     |        |                    | 5248641 | 20  | 286 | 20  | 286 | 306 | 0.0654 | (0.0208, 0.0367) | Hap 0        |
|     | Mather | type $\beta$ SNPs  | 5248200 | 262 | 205 | 262 | 205 | 467 | 0.5610 | (0.4131, 0.5015) | Hap 0        |
|     |        |                    | 5248842 | 67  | 58  | 67  | 58  | 125 | 0.5360 | (0.2922, 0.6224) | Unclassified |
| F07 | Father | type $\alpha$ SNPs | 5234678 | 114 | 0   | 114 | 0   | 114 | 1.0000 | (0.9690, 0.9978) | Hap 0        |
|     |        |                    | 5250168 | 395 | 0   | 395 | 0   | 395 | 1.0000 | (0.9793, 0.9876) | Hap 0        |
|     |        |                    | 5252251 | 322 | 1   | 322 | 1   | 323 | 0.9969 | (0.9783, 0.9885) | Hap 0        |
|     |        |                    | 5253477 | 277 | 0   | 277 | 0   | 277 | 1.0000 | (0.9775, 0.9893) | Hap 0        |
|     |        |                    | 5255912 | 408 | 0   | 408 | 0   | 408 | 1.0000 | (0.9794, 0.9874) | Hap 0        |
|     |        |                    | 5256431 | 542 | 0   | 542 | 0   | 542 | 1.0000 | (0.9804, 0.9865) | Hap 0        |
|     |        |                    | 5256647 | 264 | 0   | 264 | 0   | 264 | 1.0000 | (0.9772, 0.9896) | Hap 0        |
|     |        |                    | 5258038 | 463 | 0   | 463 | 0   | 463 | 1.0000 | (0.9799, 0.9870) | Hap 0        |
|     |        |                    | 5258162 | 356 | 0   | 356 | 0   | 356 | 1.0000 | (0.9788, 0.9880) | Hap 0        |
|     |        |                    | 5258265 | 75  | 0   | 75  | 0   | 75  | 1.0000 | (0.9615, 1.0053) | Unclassified |
|     |        |                    | 5258429 | 228 | 0   | 303 | 0   | 303 | 1.0000 | (0.9780, 0.9888) | Hap 0        |
|     |        |                    | 5258490 | 302 | 0   | 302 | 0   | 302 | 1.0000 | (0.9780, 0.9889) | Hap 0        |
|     |        |                    | 5258592 | 503 | 0   | 503 | 0   | 503 | 1.0000 | (0.9802, 0.9867) | Hap 0        |
|     |        |                    | 5258827 | 543 | 0   | 543 | 0   | 543 | 1.0000 | (0.9804, 0.9864) | Hap 0        |
|     |        |                    | 5258852 | 558 | 0   | 558 | 0   | 558 | 1.0000 | (0.9805, 0.9864) | Hap 0        |
|     |        |                    | 5258856 | 556 | 0   | 556 | 0   | 556 | 1.0000 | (0.9805, 0.9864) | Hap 0        |
|     |        |                    | 5258989 | 478 | 0   | 478 | 0   | 478 | 1.0000 | (0.9800, 0.9869) | Hap 0        |
|     |        |                    | 5259289 | 227 | 0   | 227 | 0   | 227 | 1.0000 | (0.9762, 0.9907) | Hap 0        |

|  |  |  |         |     |   |     |   |     |        |                  |              |
|--|--|--|---------|-----|---|-----|---|-----|--------|------------------|--------------|
|  |  |  | 5259292 | 212 | 0 | 212 | 0 | 212 | 1.0000 | (0.9757, 0.9912) | Hap 0        |
|  |  |  | 5259419 | 41  | 0 | 41  | 0 | 41  | 1.0000 | (0.9434, 1.0234) | Unclassified |
|  |  |  | 5259534 | 41  | 0 | 82  | 0 | 82  | 1.0000 | (0.9634, 1.0034) | Unclassified |
|  |  |  | 5259727 | 374 | 0 | 456 | 0 | 456 | 1.0000 | (0.9798, 0.9870) | Hap 0        |
|  |  |  | 5260458 | 484 | 0 | 484 | 0 | 484 | 1.0000 | (0.9800, 0.9868) | Hap 0        |
|  |  |  | 5260576 | 537 | 0 | 537 | 0 | 537 | 1.0000 | (0.9804, 0.9865) | Hap 0        |
|  |  |  | 5261239 | 505 | 0 | 505 | 0 | 505 | 1.0000 | (0.9802, 0.9867) | Hap 0        |
|  |  |  | 5262782 | 628 | 0 | 628 | 0 | 628 | 1.0000 | (0.9808, 0.9860) | Hap 0        |
|  |  |  | 5263577 | 575 | 0 | 575 | 0 | 575 | 1.0000 | (0.9806, 0.9863) | Hap 0        |
|  |  |  | 5264929 | 401 | 0 | 401 | 0 | 401 | 1.0000 | (0.9793, 0.9875) | Hap 0        |
|  |  |  | 5265366 | 67  | 1 | 67  | 1 | 68  | 0.9853 | (0.9593, 1.0076) | Unclassified |
|  |  |  | 5265475 | 11  | 0 | 78  | 1 | 79  | 0.9873 | (0.9627, 1.0042) | Unclassified |
|  |  |  | 5266728 | 490 | 0 | 568 | 1 | 569 | 0.9982 | (0.9805, 0.9863) | Hap 0        |
|  |  |  | 5266961 | 444 | 0 | 444 | 0 | 444 | 1.0000 | (0.9797, 0.9871) | Hap 0        |
|  |  |  | 5268406 | 487 | 0 | 487 | 0 | 487 | 1.0000 | (0.9801, 0.9868) | Hap 0        |
|  |  |  | 5268622 | 613 | 0 | 613 | 0 | 613 | 1.0000 | (0.9807, 0.9861) | Hap 0        |
|  |  |  | 5268797 | 509 | 0 | 509 | 0 | 509 | 1.0000 | (0.9802, 0.9866) | Hap 0        |
|  |  |  | 5269140 | 616 | 1 | 616 | 1 | 617 | 0.9984 | (0.9808, 0.9861) | Hap 0        |
|  |  |  | 5269343 | 502 | 0 | 502 | 0 | 502 | 1.0000 | (0.9802, 0.9867) | Hap 0        |
|  |  |  | 5269799 | 345 | 0 | 345 | 0 | 345 | 1.0000 | (0.9787, 0.9882) | Hap 0        |
|  |  |  | 5269806 | 356 | 2 | 356 | 2 | 358 | 0.9944 | (0.9788, 0.9880) | Hap 0        |
|  |  |  | 5270418 | 525 | 0 | 525 | 0 | 525 | 1.0000 | (0.9803, 0.9865) | Hap 0        |

|     |        |                    |         |     |     |     |     |     |        |                   |              |
|-----|--------|--------------------|---------|-----|-----|-----|-----|-----|--------|-------------------|--------------|
|     |        |                    | 5270539 | 408 | 0   | 408 | 0   | 408 | 1.0000 | (0.9794, 0.9874)  | Hap 0        |
|     |        |                    | 5272154 | 593 | 0   | 593 | 0   | 593 | 1.0000 | (0.9807, 0.9862)  | Hap 0        |
|     |        | type $\beta$ SNPs  | 5246514 | 24  | 462 | 24  | 462 | 486 | 0.0494 | (0.0196, 0.0304)  | Hap 0        |
|     |        |                    | 5247904 | 28  | 531 | 28  | 531 | 559 | 0.0501 | (0.0203, 0.0297)  | Hap 0        |
|     |        |                    | 5250551 | 27  | 553 | 27  | 553 | 580 | 0.0466 | (0.0205, 0.0295)  | Hap 0        |
|     |        |                    | 5253586 | 19  | 445 | 19  | 445 | 464 | 0.0409 | (0.0193, 0.0306)  | Hap 0        |
|     |        |                    | 5258336 | 2   | 55  | 2   | 55  | 57  | 0.0351 | (-0.0210, 0.0709) | Unclassified |
|     | Mather | type $\beta$ SNPs  | 5247992 | 236 | 328 | 236 | 328 | 564 | 0.4184 | (0.4203, 0.5094)  | Hap 1        |
| F08 | Father | type $\alpha$ SNPs | 5223871 | 363 | 0   | 363 | 0   | 363 | 1.0000 | (0.9815, 0.9911)  | Hap 0        |
|     |        |                    | 5224054 | 338 | 0   | 338 | 0   | 338 | 1.0000 | (0.9812, 0.9915)  | Hap 0        |
|     |        |                    | 5226579 | 31  | 0   | 31  | 0   | 31  | 1.0000 | (0.9300, 1.0426)  | Unclassified |
|     |        |                    | 5227471 | 331 | 0   | 362 | 0   | 362 | 1.0000 | (0.9815, 0.9911)  | Hap 0        |
|     |        |                    | 5229010 | 480 | 0   | 480 | 0   | 480 | 1.0000 | (0.9827, 0.9899)  | Hap 0        |
|     |        |                    | 5232212 | 97  | 0   | 97  | 0   | 97  | 1.0000 | (0.9683, 1.0043)  | Unclassified |
|     |        |                    | 5233697 | 348 | 0   | 445 | 0   | 445 | 1.0000 | (0.9824, 0.9902)  | Hap 0        |
|     |        |                    | 5233836 | 443 | 0   | 443 | 0   | 443 | 1.0000 | (0.9824, 0.9903)  | Hap 0        |
|     |        |                    | 5234029 | 470 | 0   | 470 | 0   | 470 | 1.0000 | (0.9826, 0.9900)  | Hap 0        |
|     |        |                    | 5234542 | 23  | 0   | 23  | 0   | 23  | 1.0000 | (0.9105, 1.0622)  | Unclassified |
|     |        |                    | 5236740 | 458 | 0   | 481 | 0   | 481 | 1.0000 | (0.9827, 0.9899)  | Hap 0        |
|     |        |                    | 5237284 | 190 | 0   | 190 | 0   | 190 | 1.0000 | (0.9771, 0.9955)  | Hap 0        |
|     |        |                    | 5237498 | 25  | 0   | 25  | 0   | 25  | 1.0000 | (0.9165,          | Unclassified |

|  |            |                          |         |     |     |     |     |     |         |                   |              |
|--|------------|--------------------------|---------|-----|-----|-----|-----|-----|---------|-------------------|--------------|
|  |            |                          |         |     |     |     |     |     | 1.0561) |                   |              |
|  |            |                          | 5244144 | 168 | 0   | 193 | 0   | 193 | 1.0000  | (0.9773, 0.9954)  | Hap 0        |
|  |            |                          | 5246000 | 449 | 0   | 449 | 0   | 449 | 1.0000  | (0.9824, 0.9902)  | Hap 0        |
|  |            |                          | 5246203 | 522 | 0   | 522 | 0   | 522 | 1.0000  | (0.9830, 0.9897)  | Hap 0        |
|  |            |                          | 5247733 | 435 | 0   | 435 | 0   | 435 | 1.0000  | (0.9823, 0.9903)  | Hap 0        |
|  |            | type<br>$\beta$<br>SNPs  | 5223920 | 7   | 309 | 7   | 309 | 316 | 0.0222  | (0.0119, 0.0302)  | Unclassified |
|  |            |                          | 5223970 | 2   | 270 | 9   | 579 | 588 | 0.0153  | (0.0161, 0.0260)  | Hap 1        |
|  |            |                          | 5228143 | 27  | 507 | 27  | 507 | 534 | 0.0506  | (0.0156, 0.0265)  | Hap 0        |
|  |            |                          | 5228708 | 20  | 428 | 20  | 428 | 448 | 0.0446  | (0.0146, 0.0275)  | Hap 0        |
|  |            |                          | 5229196 | 30  | 371 | 30  | 371 | 401 | 0.0748  | (0.0138, 0.0283)  | Hap 0        |
|  |            |                          | 5233447 | 8   | 271 | 8   | 271 | 279 | 0.0287  | (0.0107, 0.0314)  | Unclassified |
|  |            |                          | 5234781 | 1   | 20  | 9   | 291 | 300 | 0.0300  | (0.0114, 0.0307)  | Unclassified |
|  |            |                          | 5236851 | 13  | 481 | 22  | 772 | 794 | 0.0277  | (0.0174, 0.0247)  | Hap 0        |
|  |            |                          | 5243559 | 3   | 52  | 3   | 52  | 55  | 0.0545  | (-0.0315, 0.0737) | Unclassified |
|  |            |                          | 5243613 | 9   | 107 | 12  | 159 | 171 | 0.0702  | (0.0041, 0.0380)  | Hap 0        |
|  |            |                          | 5244404 | 6   | 213 | 6   | 213 | 219 | 0.0274  | (0.0079, 0.0343)  | Unclassified |
|  |            |                          | 5246356 | 22  | 457 | 28  | 670 | 698 | 0.0401  | (0.0169, 0.0252)  | Hap 0        |
|  |            |                          | 5248330 | 13  | 521 | 13  | 521 | 534 | 0.0243  | (0.0156, 0.0265)  | Unclassified |
|  |            |                          | 5253166 | 10  | 336 | 23  | 857 | 880 | 0.0261  | (0.0178, 0.0244)  | Hap 0        |
|  | Mothe<br>r | type<br>$\alpha$<br>SNPs | 5255843 | 322 | 234 | 322 | 234 | 556 | 0.5791  | (0.4699, 0.5853)  | Unclassified |
|  |            | type<br>$\beta$<br>SNPs  | 5248200 | 261 | 259 | 261 | 259 | 520 | 0.5019  | (0.4108, 0.5341)  | Unclassified |

|     |        |                    |         |     |      |     |      |      |        |                   |              |
|-----|--------|--------------------|---------|-----|------|-----|------|------|--------|-------------------|--------------|
|     |        |                    | 5250551 | 283 | 257  | 544 | 516  | 1060 | 0.5132 | (0.4422, 0.5027)  | Hap 0        |
|     |        |                    | 5258336 | 85  | 95   | 85  | 95   | 180  | 0.4722 | (0.2943, 0.6506)  | Unclassified |
| F09 | Father | type $\alpha$ SNPs | 5229835 | 708 | 46   | 708 | 46   | 754  | 0.9390 | (0.9831, 0.9876)  | Hap 1        |
|     |        |                    | 5237435 | 11  | 0    | 11  | 0    | 11   | 1.0000 | (0.8302, 1.1405)  | Unclassified |
|     |        |                    | 5246514 | 889 | 84   | 900 | 84   | 984  | 0.9146 | (0.9836, 0.9871)  | Hap 1        |
|     |        | type $\beta$ SNPs  | 5223750 | 3   | 951  | 3   | 951  | 954  | 0.0031 | (0.0194, 0.0253)  | Hap 1        |
|     |        |                    | 5223871 | 5   | 1154 | 5   | 1154 | 1159 | 0.0043 | (0.0200, 0.0248)  | Hap 1        |
|     |        |                    | 5224054 | 1   | 1027 | 1   | 1027 | 1028 | 0.0010 | (0.0197, 0.0251)  | Hap 1        |
|     |        |                    | 5224660 | 2   | 910  | 2   | 910  | 912  | 0.0022 | (0.0193, 0.0254)  | Hap 1        |
|     |        |                    | 5226579 | 0   | 116  | 0   | 116  | 116  | 0.0000 | (-0.0017, 0.0464) | Unclassified |
|     |        |                    | 5227471 | 0   | 754  | 0   | 870  | 870  | 0.0000 | (0.0192, 0.0256)  | Hap 1        |
|     |        |                    | 5227950 | 1   | 863  | 1   | 863  | 864  | 0.0012 | (0.0191, 0.0256)  | Hap 1        |
|     |        |                    | 5227975 | 0   | 827  | 0   | 827  | 827  | 0.0000 | (0.0190, 0.0257)  | Hap 1        |
|     |        |                    | 5229010 | 0   | 1158 | 0   | 1158 | 1158 | 0.0000 | (0.0200, 0.0248)  | Hap 1        |
|     |        |                    | 5229743 | 1   | 849  | 1   | 849  | 850  | 0.0012 | (0.0191, 0.0257)  | Hap 1        |
|     |        |                    | 5229745 | 0   | 847  | 0   | 847  | 847  | 0.0000 | (0.0191, 0.0257)  | Hap 1        |
|     |        |                    | 5230302 | 2   | 1144 | 2   | 1144 | 1146 | 0.0017 | (0.0199, 0.0248)  | Hap 1        |
|     |        |                    | 5231897 | 4   | 1150 | 4   | 1150 | 1154 | 0.0035 | (0.0200, 0.0248)  | Hap 1        |
|     |        |                    | 5232146 | 0   | 71   | 0   | 71   | 71   | 0.0000 | (-0.0169, 0.0617) | Unclassified |
|     |        |                    | 5232212 | 0   | 95   | 0   | 166  | 166  | 0.0000 | (0.0056, 0.0392)  | Hap 1        |
|     |        |                    | 5232573 | 1   | 983  | 1   | 983  | 984  | 0.0010 | (0.0195, 0.0252)  | Hap 1        |

|  |  |  |         |   |      |   |      |      |        |                   |              |
|--|--|--|---------|---|------|---|------|------|--------|-------------------|--------------|
|  |  |  | 5233643 | 0 | 59   | 0 | 59   | 59   | 0.0000 | (-0.0249, 0.0696) | Unclassified |
|  |  |  | 5233697 | 0 | 219  | 0 | 278  | 278  | 0.0000 | (0.0123, 0.0324)  | Hap 1        |
|  |  |  | 5233836 | 2 | 709  | 2 | 709  | 711  | 0.0028 | (0.0184, 0.0263)  | Hap 1        |
|  |  |  | 5234029 | 0 | 15   | 0 | 15   | 15   | 0.0000 | (-0.1636, 0.2083) | Unclassified |
|  |  |  | 5234542 | 0 | 89   | 0 | 104  | 104  | 0.0000 | (-0.0045, 0.0492) | Unclassified |
|  |  |  | 5234587 | 0 | 129  | 0 | 233  | 233  | 0.0000 | (0.0104, 0.0343)  | Hap 1        |
|  |  |  | 5236417 | 2 | 1127 | 2 | 1127 | 1129 | 0.0018 | (0.0199, 0.0248)  | Hap 1        |
|  |  |  | 5236740 | 2 | 536  | 2 | 536  | 538  | 0.0037 | (0.0172, 0.0276)  | Hap 1        |
|  |  |  | 5237284 | 0 | 283  | 0 | 283  | 283  | 0.0000 | (0.0125, 0.0322)  | Hap 1        |
|  |  |  | 5243757 | 0 | 855  | 0 | 855  | 855  | 0.0000 | (0.0191, 0.0256)  | Hap 1        |
|  |  |  | 5244144 | 2 | 781  | 2 | 781  | 783  | 0.0026 | (0.0188, 0.0259)  | Hap 1        |
|  |  |  | 5244299 | 0 | 566  | 0 | 566  | 566  | 0.0000 | (0.0174, 0.0273)  | Hap 1        |
|  |  |  | 5244814 | 0 | 80   | 0 | 80   | 80   | 0.0000 | (-0.0125, 0.0572) | Unclassified |
|  |  |  | 5245507 | 3 | 808  | 3 | 888  | 891  | 0.0034 | (0.0192, 0.0255)  | Hap 1        |
|  |  |  | 5246000 | 4 | 946  | 4 | 946  | 950  | 0.0042 | (0.0194, 0.0253)  | Hap 1        |
|  |  |  | 5246042 | 4 | 916  | 4 | 916  | 920  | 0.0043 | (0.0193, 0.0254)  | Hap 1        |
|  |  |  | 5246203 | 9 | 1000 | 9 | 1000 | 1009 | 0.0089 | (0.0196, 0.0251)  | Hap 1        |
|  |  |  | 5246512 | 4 | 957  | 4 | 957  | 961  | 0.0042 | (0.0195, 0.0253)  | Hap 1        |
|  |  |  | 5247141 | 1 | 840  | 1 | 840  | 841  | 0.0012 | (0.0191, 0.0257)  | Hap 1        |
|  |  |  | 5247733 | 0 | 1111 | 0 | 1111 | 1111 | 0.0000 | (0.0199, 0.0249)  | Hap 1        |
|  |  |  | 5247791 | 1 | 1188 | 1 | 1188 | 1189 | 0.0008 | (0.0200, 0.0247)  | Hap 1        |
|  |  |  | 5248243 | 4 | 920  | 4 | 920  | 924  | 0.0043 | (0.0194, 0.0254)  | Hap 1        |



|     |        |                    |         |     |     |     |     |      |        |                  |              |
|-----|--------|--------------------|---------|-----|-----|-----|-----|------|--------|------------------|--------------|
|     |        |                    | 5248641 | 0   | 946 | 0   | 946 | 946  | 0.0000 | (0.0194, 0.0253) | Hap 1        |
|     |        |                    | 5248852 | 1   | 418 | 1   | 418 | 419  | 0.0024 | (0.0157, 0.0290) | Hap 1        |
|     |        |                    | 5249004 | 2   | 740 | 2   | 740 | 742  | 0.0027 | (0.0186, 0.0261) | Hap 1        |
|     | Mather | type $\alpha$ SNPs | 5257189 | 470 | 454 | 470 | 454 | 924  | 0.5087 | (0.4983, 0.5619) | Unclassified |
|     |        |                    | 5257324 | 496 | 507 | 966 | 961 | 1927 | 0.5013 | (0.5148, 0.5453) | Hap 1        |
|     |        |                    | 5259000 | 549 | 387 | 549 | 387 | 936  | 0.5865 | (0.4987, 0.5615) | Hap 0        |
|     |        |                    | 5262001 | 478 | 492 | 478 | 492 | 970  | 0.4928 | (0.4998, 0.5604) | Hap 1        |
| F10 | Father | type $\alpha$ SNPs | 5223750 | 459 | 3   | 459 | 3   | 462  | 0.9935 | (0.9834, 0.9912) | Hap 0        |
|     |        |                    | 5223970 | 518 | 0   | 518 | 0   | 518  | 1.0000 | (0.9838, 0.9908) | Hap 0        |
|     |        |                    | 5224660 | 467 | 2   | 467 | 2   | 469  | 0.9957 | (0.9835, 0.9911) | Hap 0        |
|     |        |                    | 5227950 | 505 | 1   | 505 | 1   | 506  | 0.9980 | (0.9838, 0.9908) | Hap 0        |
|     |        |                    | 5227975 | 499 | 0   | 499 | 0   | 499  | 1.0000 | (0.9837, 0.9909) | Hap 0        |
|     |        |                    | 5228708 | 549 | 1   | 549 | 1   | 550  | 0.9982 | (0.9840, 0.9905) | Hap 0        |
|     |        |                    | 5229196 | 427 | 0   | 427 | 0   | 427  | 1.0000 | (0.9831, 0.9915) | Hap 0        |
|     |        |                    | 5229743 | 413 | 1   | 413 | 1   | 414  | 0.9976 | (0.9830, 0.9916) | Hap 0        |
|     |        |                    | 5229745 | 411 | 1   | 411 | 1   | 412  | 0.9976 | (0.9830, 0.9916) | Hap 0        |
|     |        |                    | 5231897 | 542 | 2   | 542 | 2   | 544  | 0.9963 | (0.9840, 0.9906) | Hap 0        |
|     |        |                    | 5232146 | 44  | 0   | 44  | 0   | 44   | 1.0000 | (0.9466, 1.0280) | Unclassified |
|     |        |                    | 5232573 | 544 | 2   | 588 | 2   | 590  | 0.9966 | (0.9843, 0.9903) | Hap 0        |
|     |        |                    | 5233094 | 215 | 0   | 215 | 0   | 215  | 1.0000 | (0.9790, 0.9956) | Hap 0        |
|     |        |                    | 5233643 | 30  | 0   | 30  | 0   | 30   | 1.0000 | (0.9277, 1.0469) | Unclassified |

|     |        |                    |         |     |     |     |     |     |        |                  |              |
|-----|--------|--------------------|---------|-----|-----|-----|-----|-----|--------|------------------|--------------|
|     |        |                    | 5234587 | 69  | 0   | 99  | 0   | 99  | 1.0000 | (0.9692, 1.0054) | Unclassified |
|     |        |                    | 5236417 | 561 | 2   | 660 | 2   | 662 | 0.9970 | (0.9846, 0.9900) | Hap 0        |
|     |        |                    | 5236851 | 574 | 0   | 574 | 0   | 574 | 1.0000 | (0.9842, 0.9904) | Hap 0        |
|     |        |                    | 5243559 | 63  | 0   | 63  | 0   | 63  | 1.0000 | (0.9589, 1.0157) | Unclassified |
|     |        |                    | 5243613 | 170 | 0   | 233 | 0   | 233 | 1.0000 | (0.9796, 0.9950) | Hap 0        |
|     |        |                    | 5243757 | 504 | 1   | 504 | 1   | 505 | 0.9980 | (0.9838, 0.9908) | Hap 0        |
|     |        |                    | 5244299 | 380 | 3   | 380 | 3   | 383 | 0.9922 | (0.9826, 0.9920) | Hap 0        |
|     |        |                    | 5244404 | 396 | 0   | 396 | 0   | 396 | 1.0000 | (0.9828, 0.9918) | Hap 0        |
|     |        |                    | 5245507 | 430 | 0   | 430 | 0   | 430 | 1.0000 | (0.9831, 0.9915) | Hap 0        |
|     |        |                    | 5246356 | 543 | 0   | 543 | 0   | 543 | 1.0000 | (0.9840, 0.9906) | Hap 0        |
|     |        |                    | 5246512 | 418 | 0   | 418 | 0   | 418 | 1.0000 | (0.9830, 0.9916) | Hap 0        |
|     |        |                    | 5247141 | 431 | 4   | 431 | 4   | 435 | 0.9908 | (0.9832, 0.9914) | Unclassified |
|     |        |                    | 5247791 | 453 | 2   | 884 | 6   | 890 | 0.9933 | (0.9853, 0.9893) | Hap 0        |
|     |        |                    | 5248243 | 468 | 0   | 468 | 0   | 468 | 1.0000 | (0.9835, 0.9911) | Hap 0        |
|     |        |                    | 5248641 | 445 | 4   | 445 | 4   | 449 | 0.9911 | (0.9833, 0.9913) | Unclassified |
|     |        |                    | 5248770 | 362 | 0   | 807 | 4   | 811 | 0.9951 | (0.9851, 0.9895) | Hap 0        |
|     |        |                    | 5248852 | 243 | 1   | 243 | 1   | 244 | 0.9959 | (0.9800, 0.9946) | Hap 0        |
|     |        |                    | 5249004 | 350 | 3   | 350 | 3   | 353 | 0.9915 | (0.9822, 0.9924) | Unclassified |
|     | Mather | type $\beta$ SNPs  | 5268681 | 205 | 253 | 205 | 253 | 458 | 0.4476 | (0.3979, 0.5520) | Unclassified |
| F11 | Father | type $\alpha$ SNPs | 5223750 | 590 | 0   | 590 | 0   | 590 | 1.0000 | (0.9762, 0.9813) | Hap 0        |
|     |        |                    | 5224660 | 503 | 0   | 503 | 0   | 503 | 1.0000 | (0.9757, 0.9818) | Hap 0        |

|  |  |  |         |     |   |     |   |     |        |                  |              |
|--|--|--|---------|-----|---|-----|---|-----|--------|------------------|--------------|
|  |  |  | 5227950 | 545 | 0 | 545 | 0 | 545 | 1.0000 | (0.9760, 0.9815) | Hap 0        |
|  |  |  | 5227975 | 516 | 0 | 516 | 0 | 516 | 1.0000 | (0.9758, 0.9817) | Hap 0        |
|  |  |  | 5229509 | 621 | 0 | 621 | 0 | 621 | 1.0000 | (0.9763, 0.9812) | Hap 0        |
|  |  |  | 5229743 | 369 | 2 | 369 | 2 | 371 | 0.9946 | (0.9746, 0.9829) | Hap 0        |
|  |  |  | 5231897 | 560 | 4 | 560 | 4 | 564 | 0.9929 | (0.9760, 0.9815) | Hap 0        |
|  |  |  | 5232146 | 47  | 0 | 47  | 0 | 47  | 1.0000 | (0.9463, 1.0112) | Unclassified |
|  |  |  | 5232573 | 553 | 4 | 600 | 4 | 604 | 0.9934 | (0.9762, 0.9813) | Hap 0        |
|  |  |  | 5233643 | 35  | 0 | 35  | 0 | 35  | 1.0000 | (0.9352, 1.0223) | Unclassified |
|  |  |  | 5234587 | 70  | 0 | 105 | 0 | 105 | 1.0000 | (0.9642, 0.9933) | Hap 0        |
|  |  |  | 5236417 | 685 | 1 | 685 | 1 | 686 | 0.9985 | (0.9765, 0.9810) | Hap 0        |
|  |  |  | 5243757 | 520 | 4 | 520 | 4 | 524 | 0.9924 | (0.9758, 0.9817) | Hap 0        |
|  |  |  | 5244299 | 415 | 0 | 415 | 0 | 415 | 1.0000 | (0.9751, 0.9824) | Hap 0        |
|  |  |  | 5245507 | 477 | 0 | 477 | 0 | 477 | 1.0000 | (0.9756, 0.9819) | Hap 0        |
|  |  |  | 5246512 | 590 | 2 | 590 | 2 | 592 | 0.9966 | (0.9762, 0.9813) | Hap 0        |
|  |  |  | 5247141 | 563 | 3 | 563 | 3 | 566 | 0.9947 | (0.9761, 0.9814) | Hap 0        |
|  |  |  | 5247791 | 631 | 2 | 631 | 2 | 633 | 0.9968 | (0.9763, 0.9812) | Hap 0        |
|  |  |  | 5248243 | 542 | 1 | 542 | 1 | 543 | 0.9982 | (0.9759, 0.9816) | Hap 0        |
|  |  |  | 5248641 | 561 | 1 | 561 | 1 | 562 | 0.9982 | (0.9760, 0.9815) | Hap 0        |
|  |  |  | 5248770 | 410 | 2 | 410 | 2 | 412 | 0.9951 | (0.9751, 0.9824) | Hap 0        |
|  |  |  | 5250168 | 508 | 0 | 508 | 0 | 508 | 1.0000 | (0.9758, 0.9818) | Hap 0        |
|  |  |  | 5252251 | 352 | 0 | 352 | 0 | 352 | 1.0000 | (0.9744, 0.9831) | Hap 0        |
|  |  |  | 5253477 | 354 | 0 | 354 | 0 | 354 | 1.0000 | (0.9744, 0.9831) | Hap 0        |

|  |  |  |         |     |   |     |   |     |        |                  |              |
|--|--|--|---------|-----|---|-----|---|-----|--------|------------------|--------------|
|  |  |  | 5255912 | 461 | 0 | 461 | 0 | 461 | 1.0000 | (0.9754, 0.9821) | Hap 0        |
|  |  |  | 5256647 | 344 | 0 | 344 | 0 | 344 | 1.0000 | (0.9743, 0.9832) | Hap 0        |
|  |  |  | 5257778 | 629 | 0 | 629 | 0 | 629 | 1.0000 | (0.9763, 0.9812) | Hap 0        |
|  |  |  | 5258162 | 344 | 0 | 344 | 0 | 344 | 1.0000 | (0.9743, 0.9832) | Hap 0        |
|  |  |  | 5258265 | 71  | 0 | 71  | 0 | 71  | 1.0000 | (0.9573, 1.0002) | Unclassified |
|  |  |  | 5258429 | 255 | 0 | 326 | 0 | 326 | 1.0000 | (0.9741, 0.9834) | Hap 0        |
|  |  |  | 5258490 | 371 | 0 | 371 | 0 | 371 | 1.0000 | (0.9746, 0.9829) | Hap 0        |
|  |  |  | 5258592 | 606 | 0 | 606 | 0 | 606 | 1.0000 | (0.9762, 0.9813) | Hap 0        |
|  |  |  | 5258827 | 596 | 1 | 596 | 1 | 597 | 0.9983 | (0.9762, 0.9813) | Hap 0        |
|  |  |  | 5258852 | 630 | 0 | 630 | 0 | 630 | 1.0000 | (0.9763, 0.9812) | Hap 0        |
|  |  |  | 5258856 | 622 | 3 | 622 | 3 | 625 | 0.9952 | (0.9763, 0.9812) | Hap 0        |
|  |  |  | 5258989 | 531 | 0 | 531 | 0 | 531 | 1.0000 | (0.9759, 0.9816) | Hap 0        |
|  |  |  | 5259289 | 316 | 0 | 316 | 0 | 316 | 1.0000 | (0.9739, 0.9836) | Hap 0        |
|  |  |  | 5259292 | 303 | 0 | 303 | 0 | 303 | 1.0000 | (0.9737, 0.9838) | Hap 0        |
|  |  |  | 5259419 | 51  | 0 | 51  | 0 | 51  | 1.0000 | (0.9489, 1.0086) | Unclassified |
|  |  |  | 5259727 | 432 | 0 | 483 | 0 | 483 | 1.0000 | (0.9756, 0.9819) | Hap 0        |
|  |  |  | 5260458 | 568 | 0 | 568 | 0 | 568 | 1.0000 | (0.9761, 0.9814) | Hap 0        |
|  |  |  | 5260576 | 612 | 0 | 612 | 0 | 612 | 1.0000 | (0.9763, 0.9812) | Hap 0        |
|  |  |  | 5261239 | 639 | 0 | 639 | 0 | 639 | 1.0000 | (0.9764, 0.9811) | Hap 0        |
|  |  |  | 5263683 | 515 | 1 | 515 | 1 | 516 | 0.9981 | (0.9758, 0.9817) | Hap 0        |
|  |  |  | 5264146 | 692 | 0 | 692 | 0 | 692 | 1.0000 | (0.9765, 0.9810) | Hap 0        |
|  |  |  | 5265106 | 667 | 0 | 667 | 0 | 667 | 1.0000 | (0.9765, 0.9810) | Hap 0        |

|  |        |                          |         |     |     |     |     |      |        |                   |              |
|--|--------|--------------------------|---------|-----|-----|-----|-----|------|--------|-------------------|--------------|
|  |        |                          | 5265680 | 299 | 0   | 299 | 0   | 299  | 1.0000 | (0.9737, 0.9838)  | Hap 0        |
|  |        |                          | 5266728 | 574 | 0   | 574 | 0   | 574  | 1.0000 | (0.9761, 0.9814)  | Hap 0        |
|  |        |                          | 5268406 | 592 | 0   | 592 | 0   | 592  | 1.0000 | (0.9762, 0.9813)  | Hap 0        |
|  |        |                          | 5268622 | 621 | 0   | 621 | 0   | 621  | 1.0000 | (0.9763, 0.9812)  | Hap 0        |
|  |        |                          | 5268797 | 583 | 0   | 583 | 0   | 583  | 1.0000 | (0.9761, 0.9814)  | Hap 0        |
|  |        |                          | 5269343 | 719 | 0   | 719 | 0   | 719  | 1.0000 | (0.9766, 0.9809)  | Hap 0        |
|  |        |                          | 5269806 | 365 | 1   | 365 | 1   | 366  | 0.9973 | (0.9746, 0.9829)  | Hap 0        |
|  |        |                          | 5269931 | 492 | 2   | 492 | 2   | 494  | 0.9960 | (0.9757, 0.9818)  | Hap 0        |
|  |        |                          | 5271671 | 680 | 0   | 680 | 0   | 680  | 1.0000 | (0.9765, 0.9810)  | Hap 0        |
|  |        |                          | 5272154 | 704 | 1   | 704 | 1   | 705  | 0.9986 | (0.9766, 0.9809)  | Hap 0        |
|  | Mather | type<br>$\alpha$<br>SNPs | 5223920 | 352 | 251 | 352 | 251 | 603  | 0.5837 | (0.5173, 0.5784)  | Hap 0        |
|  |        |                          | 5223970 | 378 | 243 | 378 | 243 | 621  | 0.6087 | (0.5182, 0.5775)  | Hap 0        |
|  |        |                          | 5228143 | 377 | 242 | 377 | 242 | 619  | 0.6090 | (0.5181, 0.5776)  | Hap 0        |
|  |        |                          | 5228708 | 383 | 252 | 383 | 252 | 635  | 0.6031 | (0.5188, 0.5768)  | Hap 0        |
|  |        |                          | 5229196 | 369 | 235 | 369 | 235 | 604  | 0.6109 | (0.5173, 0.5783)  | Hap 0        |
|  |        |                          | 5233447 | 11  | 4   | 11  | 4   | 15   | 0.7333 | (-0.6803, 1.7759) | Unclassified |
|  |        |                          | 5234781 | 80  | 51  | 91  | 55  | 146  | 0.6233 | (0.4216, 0.6740)  | Unclassified |
|  |        |                          | 5236851 | 360 | 276 | 451 | 331 | 782  | 0.5767 | (0.5243, 0.5714)  | Hap 0        |
|  |        |                          | 5243559 | 36  | 35  | 36  | 35  | 71   | 0.5070 | (0.2884, 0.8073)  | Unclassified |
|  |        |                          | 5243613 | 71  | 83  | 107 | 118 | 225  | 0.4756 | (0.4659, 0.6297)  | Unclassified |
|  |        |                          | 5244404 | 272 | 164 | 379 | 282 | 661  | 0.5734 | (0.5199, 0.5757)  | Unclassified |
|  |        |                          | 5246356 | 368 | 206 | 747 | 488 | 1235 | 0.6049 | (0.5329, 0.6049)  | Hap 0        |

|     |        |                          |         |     |     |     |     |      |        |                     |              |
|-----|--------|--------------------------|---------|-----|-----|-----|-----|------|--------|---------------------|--------------|
|     |        |                          |         |     |     |     |     |      |        | 0.5627)             |              |
|     |        |                          | 5248852 | 154 | 48  | 154 | 48  | 202  | 0.7624 | (0.4566,<br>0.6390) | Hap 0        |
|     |        |                          | 5249004 | 300 | 171 | 300 | 171 | 471  | 0.6369 | (0.5087,<br>0.5869) | Hap 0        |
| F12 | Father | type<br>$\alpha$<br>SNPs | 5248852 | 87  | 3   | 87  | 3   | 90   | 0.9667 | (0.9678,<br>1.0087) | Hap 1        |
|     |        | type<br>$\beta$<br>SNPs  | 5250261 | 0   | 288 | 0   | 288 | 288  | 0.0000 | (0.0074,<br>0.0293) | Hap 1        |
|     | Mather | type<br>$\alpha$<br>SNPs | 5223750 | 130 | 142 | 130 | 142 | 272  | 0.4779 | (0.3783,<br>0.6668) | Unclassified |
|     |        |                          | 5223871 | 148 | 150 | 278 | 292 | 570  | 0.4877 | (0.4537,<br>0.5914) | Unclassified |
|     |        |                          | 5224054 | 120 | 116 | 398 | 408 | 806  | 0.4938 | (0.4739,<br>0.5712) | Unclassified |
|     |        |                          | 5224660 | 129 | 148 | 527 | 556 | 1083 | 0.4866 | (0.4863,<br>0.5588) | Unclassified |
|     |        |                          | 5227471 | 110 | 116 | 637 | 672 | 1309 | 0.4866 | (0.4926,<br>0.5525) | Hap 1        |
|     |        |                          | 5227950 | 44  | 63  | 44  | 63  | 107  | 0.4112 | (0.1558,<br>0.8893) | Unclassified |
|     |        |                          | 5227975 | 51  | 65  | 95  | 128 | 223  | 0.4260 | (0.3466,<br>0.6985) | Unclassified |
|     |        |                          | 5229010 | 175 | 170 | 270 | 298 | 568  | 0.4754 | (0.4535,<br>0.5916) | Unclassified |
|     |        |                          | 5229743 | 104 | 166 | 374 | 464 | 838  | 0.4463 | (0.4757,<br>0.5694) | Hap 1        |
|     |        |                          | 5230302 | 220 | 232 | 220 | 232 | 452  | 0.4867 | (0.4357,<br>0.6094) | Unclassified |
|     |        |                          | 5231897 | 228 | 228 | 448 | 460 | 908  | 0.4934 | (0.4793,<br>0.5658) | Unclassified |
|     |        |                          | 5232146 | 19  | 24  | 467 | 484 | 951  | 0.4911 | (0.4813,<br>0.5638) | Unclassified |
|     |        |                          | 5232212 | 10  | 20  | 477 | 504 | 981  | 0.4862 | (0.4826,<br>0.5626) | Unclassified |
|     |        |                          | 5232573 | 152 | 123 | 629 | 627 | 1256 | 0.5008 | (0.4913,<br>0.5538) | Unclassified |
|     |        |                          | 5233643 | 100 | 95  | 729 | 722 | 1451 | 0.5024 | (0.4955,<br>0.5496) | Unclassified |
|     |        |                          | 5233697 | 143 | 139 | 872 | 861 | 1733 | 0.5032 | (0.4999,<br>0.5452) | Unclassified |

|  |  |  |         |     |     |      |      |      |        |                  |              |
|--|--|--|---------|-----|-----|------|------|------|--------|------------------|--------------|
|  |  |  | 5233836 | 181 | 181 | 1053 | 1042 | 2095 | 0.5026 | (0.5038, 0.5413) | Hap 1        |
|  |  |  | 5234029 | 163 | 177 | 163  | 177  | 340  | 0.4794 | (0.4071, 0.6380) | Unclassified |
|  |  |  | 5234542 | 9   | 6   | 172  | 183  | 355  | 0.4845 | (0.4120, 0.6331) | Unclassified |
|  |  |  | 5236417 | 187 | 239 | 359  | 422  | 781  | 0.4597 | (0.4723, 0.5728) | Hap 1        |
|  |  |  | 5236740 | 145 | 175 | 145  | 175  | 320  | 0.4531 | (0.3999, 0.6452) | Unclassified |
|  |  |  | 5237284 | 89  | 76  | 234  | 251  | 485  | 0.4825 | (0.4417, 0.6035) | Unclassified |
|  |  |  | 5243757 | 123 | 132 | 357  | 383  | 740  | 0.4824 | (0.4695, 0.5756) | Unclassified |
|  |  |  | 5244144 | 47  | 56  | 404  | 439  | 843  | 0.4792 | (0.4760, 0.5691) | Unclassified |
|  |  |  | 5244299 | 28  | 39  | 432  | 478  | 910  | 0.4747 | (0.4794, 0.5657) | Hap 1        |
|  |  |  | 5245507 | 114 | 145 | 114  | 145  | 259  | 0.4402 | (0.3711, 0.6741) | Unclassified |
|  |  |  | 5246000 | 189 | 189 | 303  | 334  | 637  | 0.4757 | (0.4610, 0.5842) | Unclassified |
|  |  |  | 5246203 | 226 | 225 | 529  | 559  | 1088 | 0.4862 | (0.4865, 0.5586) | Hap 1        |
|  |  |  | 5246512 | 168 | 180 | 168  | 180  | 348  | 0.4828 | (0.4098, 0.6353) | Unclassified |
|  |  |  | 5247141 | 126 | 127 | 294  | 307  | 601  | 0.4892 | (0.4573, 0.5878) | Unclassified |
|  |  |  | 5247733 | 138 | 182 | 432  | 489  | 921  | 0.4691 | (0.4800, 0.5652) | Hap 1        |
|  |  |  | 5247791 | 194 | 208 | 194  | 208  | 402  | 0.4826 | (0.4249, 0.6202) | Unclassified |
|  |  |  | 5248243 | 211 | 186 | 405  | 394  | 799  | 0.5069 | (0.4734, 0.5717) | Unclassified |
|  |  |  | 5248641 | 188 | 182 | 593  | 576  | 1169 | 0.5073 | (0.4890, 0.5561) | Unclassified |
|  |  |  | 5248770 | 140 | 116 | 733  | 692  | 1425 | 0.5144 | (0.4950, 0.5501) | Unclassified |
|  |  |  | 5248842 | 30  | 59  | 763  | 751  | 1514 | 0.5040 | (0.4966, 0.5485) | Unclassified |
|  |  |  | 5257189 | 160 | 156 | 923  | 907  | 1830 | 0.5044 | (0.5011, 0.5440) | Unclassified |
|  |  |  | 5259000 | 243 | 140 | 1166 | 1047 | 2213 | 0.5269 | (0.5048, 0.5403) | Unclassified |

|     |        |                          |         |     |     |      |      |      |        |                     |              |
|-----|--------|--------------------------|---------|-----|-----|------|------|------|--------|---------------------|--------------|
| F13 | Father | type<br>$\alpha$<br>SNPs | 5223920 | 532 | 0   | 532  | 0    | 532  | 1.0000 | (0.9830,<br>0.9896) | Hap 0        |
|     |        |                          | 5225021 | 129 | 0   | 129  | 0    | 129  | 1.0000 | (0.9728,<br>0.9998) | Hap 0        |
|     |        |                          | 5228143 | 618 | 0   | 618  | 0    | 618  | 1.0000 | (0.9835,<br>0.9891) | Hap 0        |
|     |        |                          | 5228708 | 628 | 0   | 628  | 0    | 628  | 1.0000 | (0.9835,<br>0.9891) | Hap 0        |
|     |        |                          | 5229196 | 589 | 0   | 589  | 0    | 589  | 1.0000 | (0.9834,<br>0.9893) | Hap 0        |
|     |        |                          | 5236792 | 559 | 0   | 559  | 0    | 559  | 1.0000 | (0.9832,<br>0.9894) | Hap 0        |
|     |        |                          | 5236851 | 612 | 0   | 612  | 0    | 612  | 1.0000 | (0.9835,<br>0.9892) | Hap 0        |
|     |        |                          | 5253586 | 571 | 0   | 571  | 0    | 571  | 1.0000 | (0.9833,<br>0.9894) | Hap 0        |
|     | Mather | type<br>$\alpha$<br>SNPs | 5224660 | 317 | 237 | 317  | 237  | 554  | 0.5722 | (0.4697,<br>0.5855) | Unclassified |
|     |        |                          | 5227950 | 289 | 236 | 606  | 473  | 1079 | 0.5616 | (0.4979,<br>0.5573) | Hap 0        |
|     |        |                          | 5227975 | 257 | 234 | 257  | 234  | 491  | 0.5234 | (0.4623,<br>0.5929) | Unclassified |
|     |        |                          | 5229743 | 187 | 220 | 444  | 454  | 898  | 0.4944 | (0.4919,<br>0.5633) | Unclassified |
|     |        |                          | 5231897 | 364 | 296 | 808  | 750  | 1558 | 0.5186 | (0.5070,<br>0.5482) | Unclassified |
|     |        |                          | 5232573 | 337 | 248 | 1145 | 998  | 2143 | 0.5343 | (0.5126,<br>0.5425) | Unclassified |
|     |        |                          | 5236417 | 294 | 283 | 1439 | 1281 | 2720 | 0.5290 | (0.5158,<br>0.5394) | Unclassified |
|     |        |                          | 5247876 | 301 | 244 | 1740 | 1525 | 3265 | 0.5329 | (0.5178,<br>0.5374) | Unclassified |
|     |        |                          | 5249004 | 260 | 172 | 2000 | 1697 | 3697 | 0.5410 | (0.5189,<br>0.5363) | Hap 0        |
|     |        | type<br>$\beta$<br>SNPs  | 5249290 | 256 | 258 | 256  | 258  | 514  | 0.4981 | (0.4100,<br>0.5348) | Unclassified |



Supplementary Table S7: Determining the paternally and maternally inherited haplotype by RHDO analysis of 20 kb amplicons.

| Family |        |                    | Genomic location | Counts for the allele on Hap 0 | Counts for the allele on Hap 1 | Cumulative count for alleles on Hap 0 | Cumulative count for alleles on Hap 1 | Total no. of reads | Fraction of total reads contributed by Hap 0 alleles | Classification threshold (upper, lower) | SPRT classification result |
|--------|--------|--------------------|------------------|--------------------------------|--------------------------------|---------------------------------------|---------------------------------------|--------------------|------------------------------------------------------|-----------------------------------------|----------------------------|
| F01    | Father | type $\alpha$ SNPs | 5228143          | 1013                           | 0                              | 1013                                  | 0                                     | 1013               | 1.0000                                               | (0.9837, 0.9870)                        | Hap 0                      |
|        |        |                    | 5228708          | 993                            | 3                              | 993                                   | 3                                     | 996                | 0.9970                                               | (0.9836, 0.9871)                        | Hap 0                      |
|        |        |                    | 5229196          | 884                            | 3                              | 884                                   | 3                                     | 887                | 0.9966                                               | (0.9834, 0.9873)                        | Hap 0                      |
|        |        |                    | 5233447          | 24                             | 0                              | 24                                    | 0                                     | 24                 | 1.0000                                               | (0.9143, 1.0564)                        | Unclassified               |
|        |        |                    | 5234781          | 148                            | 0                              | 172                                   | 0                                     | 172                | 1.0000                                               | (0.9754, 0.9953)                        | Hap 0                      |
|        |        |                    | 5236851          | 947                            | 2                              | 947                                   | 2                                     | 949                | 0.9979                                               | (0.9836, 0.9871)                        | Hap 0                      |
|        |        |                    | 5243559          | 89                             | 0                              | 89                                    | 0                                     | 89                 | 1.0000                                               | (0.9662, 1.0045)                        | Unclassified               |
|        |        |                    | 5243613          | 211                            | 0                              | 300                                   | 0                                     | 300                | 1.0000                                               | (0.9797, 0.9910)                        | Hap 0                      |
|        |        |                    | 5244404          | 572                            | 1                              | 572                                   | 1                                     | 573                | 0.9983                                               | (0.9824, 0.9883)                        | Hap 0                      |
|        |        |                    | 5246356          | 822                            | 1                              | 822                                   | 1                                     | 823                | 0.9988                                               | (0.9833, 0.9874)                        | Hap 0                      |
|        |        | type $\beta$ SNPs  | 5247992          | 45                             | 990                            | 45                                    | 990                                   | 1035               | 0.0435                                               | (0.0197, 0.0251)                        | Hap 0                      |
|        |        |                    | 5257189          | 47                             | 882                            | 47                                    | 882                                   | 929                | 0.0506                                               | (0.0194, 0.0254)                        | Hap 0                      |
|        |        |                    | 5259000          | 43                             | 1010                           | 43                                    | 1010                                  | 1053               | 0.0408                                               | (0.0197, 0.0250)                        | Hap 0                      |
|        | Mother | type $\alpha$ SNPs | 5229835          | 342                            | 300                            | 342                                   | 300                                   | 642                | 0.5327                                               | (0.4843, 0.5759)                        | Unclassified               |
|        |        |                    | 5237435          | 13                             | 11                             | 355                                   | 311                                   | 666                | 0.5330                                               | (0.4859, 0.5742)                        | Unclassified               |
|        |        |                    | 5246514          | 471                            | 331                            | 826                                   | 642                                   | 1468               | 0.5627                                               | (0.5100,                                | Hap 0                      |

|     |        |                          |         |      |     |      |      |      |        |                   |              |
|-----|--------|--------------------------|---------|------|-----|------|------|------|--------|-------------------|--------------|
|     |        |                          |         |      |     |      |      |      |        | 0.5501)           |              |
|     |        |                          | 5264411 | 531  | 395 | 531  | 395  | 926  | 0.5734 | (0.4983, 0.5618)  | Hap 0        |
|     |        | type<br>$\beta$<br>SNPs  | 5226579 | 40   | 67  | 40   | 67   | 107  | 0.3738 | (0.1952, 0.7447)  | Unclassified |
|     |        |                          | 5227471 | 355  | 360 | 395  | 427  | 822  | 0.4805 | (0.4342, 0.5057)  | Unclassified |
|     |        |                          | 5229010 | 482  | 459 | 877  | 886  | 1763 | 0.4974 | (0.4533, 0.4866)  | Hap 0        |
|     |        |                          | 5232212 | 35   | 48  | 35   | 48   | 83   | 0.4217 | (0.1157, 0.8241)  | Unclassified |
|     |        |                          | 5233697 | 134  | 104 | 169  | 152  | 321  | 0.5265 | (0.3783, 0.5615)  | Unclassified |
|     |        |                          | 5233836 | 364  | 335 | 533  | 487  | 1020 | 0.5225 | (0.4411, 0.4988)  | Hap 0        |
|     |        |                          | 5234029 | 9    | 10  | 9    | 10   | 19   | 0.4737 | (-1.0774, 2.0173) | Unclassified |
|     |        |                          | 5234542 | 25   | 37  | 34   | 47   | 81   | 0.4198 | (0.1070, 0.8329)  | Unclassified |
|     |        |                          | 5236740 | 271  | 275 | 305  | 322  | 627  | 0.4864 | (0.4230, 0.5168)  | Unclassified |
|     |        |                          | 5237284 | 117  | 145 | 422  | 467  | 889  | 0.4747 | (0.4369, 0.5030)  | Unclassified |
|     |        |                          | 5244144 | 398  | 393 | 820  | 860  | 1680 | 0.4881 | (0.4524, 0.4874)  | Hap 0        |
|     |        |                          | 5245406 | 279  | 293 | 279  | 293  | 572  | 0.4878 | (0.4185, 0.5213)  | Unclassified |
|     |        |                          | 5246000 | 408  | 368 | 687  | 661  | 1348 | 0.5096 | (0.4481, 0.4917)  | Hap 0        |
|     |        |                          | 5246203 | 394  | 324 | 394  | 324  | 718  | 0.5487 | (0.4290, 0.5109)  | Hap 0        |
|     |        |                          | 5247153 | 338  | 387 | 338  | 387  | 725  | 0.4662 | (0.4294, 0.5105)  | Unclassified |
|     |        |                          | 5247733 | 439  | 464 | 777  | 851  | 1628 | 0.4773 | (0.4519, 0.4880)  | Unclassified |
|     |        |                          | 5266843 | 452  | 493 | 1229 | 1344 | 2573 | 0.4777 | (0.4585, 0.4814)  | Unclassified |
| F02 | Father | type<br>$\alpha$<br>SNPs | 5229835 | 897  | 4   | 897  | 4    | 901  | 0.9956 | (0.9762, 0.9795)  | Hap 0        |
|     |        |                          | 5237435 | 14   | 0   | 14   | 0    | 14   | 1.0000 | (0.8703, 1.0854)  | Unclassified |
|     |        |                          | 5246514 | 1361 | 2   | 1375 | 2    | 1377 | 0.9985 | (0.9767,          | Hap 0        |

|  |        |                          |         |     |      |     |      |      |         |                      |              |
|--|--------|--------------------------|---------|-----|------|-----|------|------|---------|----------------------|--------------|
|  |        |                          |         |     |      |     |      |      | 0.9789) |                      |              |
|  |        | type<br>$\beta$<br>SNPs  | 5226579 | 2   | 73   | 2   | 73   | 75   | 0.0267  | (0.0019,<br>0.0629)  | Unclassified |
|  |        |                          | 5227471 | 97  | 842  | 99  | 915  | 1014 | 0.0976  | (0.0302,<br>0.0347)  | Hap 0        |
|  |        |                          | 5229010 | 152 | 1437 | 152 | 1437 | 1589 | 0.0957  | (0.0310,<br>0.0339)  | Hap 0        |
|  |        |                          | 5232212 | 3   | 88   | 3   | 88   | 91   | 0.0330  | (0.0072,<br>0.0576)  | Unclassified |
|  |        |                          | 5233697 | 25  | 298  | 28  | 386  | 414  | 0.0676  | (0.0269,<br>0.0379)  | Hap 0        |
|  |        |                          | 5233836 | 126 | 944  | 126 | 944  | 1070 | 0.1178  | (0.0303,<br>0.0346)  | Hap 0        |
|  |        |                          | 5234029 | 1   | 22   | 1   | 22   | 23   | 0.0435  | (-0.0672,<br>0.1320) | Unclassified |
|  |        |                          | 5234542 | 3   | 61   | 4   | 83   | 87   | 0.0460  | (0.0061,<br>0.0587)  | Unclassified |
|  |        |                          | 5236740 | 62  | 663  | 66  | 746  | 812  | 0.0813  | (0.0296,<br>0.0352)  | Hap 0        |
|  |        |                          | 5237284 | 29  | 299  | 29  | 299  | 328  | 0.0884  | (0.0254,<br>0.0394)  | Hap 0        |
|  |        |                          | 5244144 | 70  | 938  | 70  | 938  | 1008 | 0.0694  | (0.0301,<br>0.0347)  | Hap 0        |
|  |        |                          | 5245406 | 56  | 749  | 56  | 749  | 805  | 0.0696  | (0.0296,<br>0.0353)  | Hap 0        |
|  |        |                          | 5246000 | 138 | 1350 | 138 | 1350 | 1488 | 0.0927  | (0.0309,<br>0.0340)  | Hap 0        |
|  |        |                          | 5246203 | 139 | 1135 | 139 | 1135 | 1274 | 0.1091  | (0.0306,<br>0.0342)  | Hap 0        |
|  |        |                          | 5247153 | 94  | 962  | 94  | 962  | 1056 | 0.0890  | (0.0302,<br>0.0346)  | Hap 0        |
|  |        |                          | 5247733 | 165 | 1454 | 165 | 1454 | 1619 | 0.1019  | (0.0310,<br>0.0338)  | Hap 0        |
|  | Mother | type<br>$\alpha$<br>SNPs | 5228143 | 845 | 533  | 845 | 533  | 1378 | 0.6132  | (0.5377,<br>0.5630)  | Hap 0        |
|  |        |                          | 5228708 | 922 | 559  | 922 | 559  | 1481 | 0.6226  | (0.5385,<br>0.5621)  | Hap 0        |
|  |        |                          | 5229196 | 728 | 434  | 728 | 434  | 1162 | 0.6265  | (0.5353,<br>0.5654)  | Hap 0        |
|  |        |                          | 5233447 | 6   | 4    | 6   | 4    | 10   | 0.6000  | (-1.1983,<br>2.2990) | Unclassified |
|  |        |                          | 5234781 | 133 | 88   | 139 | 92   | 231  | 0.6017  | (0.4746,             | Unclassified |

|     |        |                    |         |     |     |     |     |      |         |                  |              |
|-----|--------|--------------------|---------|-----|-----|-----|-----|------|---------|------------------|--------------|
|     |        |                    |         |     |     |     |     |      | 0.6260) |                  |              |
|     |        |                    | 5236851 | 822 | 558 | 961 | 650 | 1611 | 0.5965  | (0.5395, 0.5612) | Hap 0        |
|     |        |                    | 5243559 | 67  | 45  | 67  | 45  | 112  | 0.5982  | (0.3942, 0.7065) | Unclassified |
|     |        |                    | 5243613 | 142 | 116 | 209 | 161 | 370  | 0.5649  | (0.5031, 0.5976) | Unclassified |
|     |        |                    | 5244383 | 464 | 264 | 673 | 425 | 1098 | 0.6129  | (0.5344, 0.5663) | Hap 0        |
|     |        |                    | 5244404 | 427 | 237 | 427 | 237 | 664  | 0.6431  | (0.5240, 0.5767) | Hap 0        |
|     |        |                    | 5246356 | 947 | 513 | 947 | 513 | 1460 | 0.6486  | (0.5384, 0.5623) | Hap 0        |
|     |        |                    | 5248852 | 328 | 48  | 328 | 48  | 376  | 0.8723  | (0.5038, 0.5968) | Hap 0        |
|     |        |                    | 5262368 | 557 | 414 | 557 | 414 | 971  | 0.5736  | (0.5323, 0.5683) | Hap 0        |
|     |        | type $\beta$ SNPs  | 5248200 | 726 | 777 | 726 | 777 | 1503 | 0.4830  | (0.4380, 0.4613) | Hap 0        |
|     |        |                    | 5248770 | 517 | 331 | 517 | 331 | 848  | 0.6097  | (0.4290, 0.4703) | Hap 0        |
|     |        |                    | 5248842 | 286 | 54  | 286 | 54  | 340  | 0.8412  | (0.3982, 0.5011) | Hap 0        |
| F03 | Father | type $\beta$ SNPs  | 5247992 | 86  | 616 | 86  | 616 | 702  | 0.1225  | (0.0253, 0.0322) | Hap 0        |
|     |        |                    | 5257189 | 52  | 326 | 52  | 326 | 378  | 0.1376  | (0.0223, 0.0352) | Hap 0        |
|     |        |                    | 5259000 | 41  | 399 | 41  | 399 | 440  | 0.0932  | (0.0232, 0.0343) | Hap 0        |
|     | Mother | type $\alpha$ SNPs | 5228708 | 235 | 148 | 235 | 148 | 383  | 0.6136  | (0.4888, 0.5966) | Hap 0        |
|     |        |                    | 5229196 | 210 | 101 | 210 | 101 | 311  | 0.6752  | (0.4763, 0.6091) | Hap 0        |
|     |        |                    | 5235864 | 32  | 22  | 32  | 22  | 54   | 0.5926  | (0.1603, 0.9251) | Unclassified |
|     |        |                    | 5236851 | 216 | 102 | 248 | 124 | 372  | 0.6667  | (0.4872, 0.5982) | Hap 0        |
|     |        |                    | 5243613 | 34  | 13  | 34  | 13  | 47   | 0.7234  | (0.1033, 0.9821) | Unclassified |
|     |        |                    | 5244404 | 126 | 58  | 160 | 71  | 231  | 0.6926  | (0.4533, 0.6321) | Hap 0        |

|     |        |                    |         |     |     |     |     |      |        |                  |              |
|-----|--------|--------------------|---------|-----|-----|-----|-----|------|--------|------------------|--------------|
|     |        |                    | 5246356 | 232 | 98  | 232 | 98  | 330  | 0.7030 | (0.4801, 0.6053) | Hap 0        |
|     |        |                    | 5253586 | 214 | 104 | 214 | 104 | 318  | 0.6730 | (0.4778, 0.6076) | Hap 0        |
|     |        | type $\beta$ SNPs  | 5227471 | 104 | 114 | 104 | 114 | 218  | 0.4771 | (0.3626, 0.5520) | Unclassified |
|     |        |                    | 5229010 | 215 | 230 | 319 | 344 | 663  | 0.4811 | (0.4261, 0.4884) | Unclassified |
|     |        |                    | 5233697 | 16  | 24  | 335 | 368 | 703  | 0.4765 | (0.4279, 0.4867) | Unclassified |
|     |        |                    | 5233836 | 122 | 154 | 457 | 522 | 979  | 0.4668 | (0.4362, 0.4784) | Unclassified |
|     |        |                    | 5234542 | 4   | 6   | 461 | 528 | 989  | 0.4661 | (0.4364, 0.4782) | Unclassified |
|     |        |                    | 5236740 | 96  | 89  | 557 | 617 | 1174 | 0.4744 | (0.4397, 0.4749) | Unclassified |
|     |        |                    | 5237284 | 38  | 18  | 595 | 635 | 1230 | 0.4837 | (0.4405, 0.4741) | Hap 0        |
|     |        |                    | 5244144 | 102 | 111 | 102 | 111 | 213  | 0.4789 | (0.3603, 0.5542) | Unclassified |
|     |        |                    | 5245406 | 112 | 107 | 214 | 218 | 432  | 0.4954 | (0.4095, 0.5051) | Unclassified |
|     |        |                    | 5246000 | 209 | 213 | 423 | 431 | 854  | 0.4953 | (0.4331, 0.4815) | Hap 0        |
|     |        |                    | 5246203 | 149 | 179 | 149 | 179 | 328  | 0.4543 | (0.3943, 0.5203) | Unclassified |
|     |        |                    | 5247153 | 143 | 136 | 292 | 315 | 607  | 0.4811 | (0.4233, 0.4913) | Unclassified |
|     |        |                    | 5247733 | 205 | 232 | 497 | 547 | 1044 | 0.4761 | (0.4375, 0.4771) | Unclassified |
| F04 | Father | type $\alpha$ SNPs | 5255989 | 818 | 0   | 818 | 0   | 818  | 1.0000 | (0.9823, 0.9864) | Hap 0        |
|     |        |                    | 5257778 | 837 | 0   | 837 | 0   | 837  | 1.0000 | (0.9824, 0.9864) | Hap 0        |
|     |        |                    | 5263683 | 636 | 0   | 636 | 0   | 636  | 1.0000 | (0.9818, 0.9870) | Hap 0        |
|     |        |                    | 5264146 | 903 | 2   | 903 | 2   | 905  | 0.9978 | (0.9825, 0.9862) | Hap 0        |
|     |        |                    | 5265106 | 826 | 0   | 826 | 0   | 826  | 1.0000 | (0.9824, 0.9864) | Hap 0        |
|     |        |                    | 5265680 | 406 | 0   | 406 | 0   | 406  | 1.0000 | (0.9803, 0.9885) | Hap 0        |

|  |        |                    |         |     |     |      |      |      |        |                  |              |
|--|--------|--------------------|---------|-----|-----|------|------|------|--------|------------------|--------------|
|  |        |                    | 5269931 | 690 | 1   | 690  | 1    | 691  | 0.9986 | (0.9820, 0.9868) | Hap 0        |
|  |        |                    | 5271671 | 867 | 4   | 867  | 4    | 871  | 0.9954 | (0.9825, 0.9863) | Hap 0        |
|  |        | type $\beta$ SNPs  | 5248200 | 42  | 800 | 42   | 800  | 842  | 0.0499 | (0.0205, 0.0269) | Hap 0        |
|  |        |                    | 5248842 | 20  | 136 | 20   | 136  | 156  | 0.1282 | (0.0064, 0.0410) | Hap 0        |
|  | Mother | type $\alpha$ SNPs | 5227950 | 327 | 214 | 327  | 214  | 541  | 0.6044 | (0.4825, 0.5827) | Hap 0        |
|  |        |                    | 5227975 | 326 | 214 | 326  | 214  | 540  | 0.6037 | (0.4824, 0.5828) | Hap 0        |
|  |        |                    | 5228143 | 458 | 398 | 458  | 398  | 856  | 0.5350 | (0.5009, 0.5643) | Unclassified |
|  |        |                    | 5228708 | 457 | 377 | 915  | 775  | 1690 | 0.5414 | (0.5165, 0.5486) | Unclassified |
|  |        |                    | 5229196 | 481 | 336 | 1396 | 1111 | 2507 | 0.5568 | (0.5218, 0.5434) | Hap 0        |
|  |        |                    | 5229743 | 409 | 156 | 409  | 156  | 565  | 0.7239 | (0.4846, 0.5806) | Hap 0        |
|  |        |                    | 5229745 | 410 | 151 | 410  | 151  | 561  | 0.7308 | (0.4843, 0.5809) | Hap 0        |
|  |        |                    | 5230302 | 504 | 434 | 504  | 434  | 938  | 0.5373 | (0.5037, 0.5615) | Unclassified |
|  |        |                    | 5231897 | 515 | 377 | 1019 | 811  | 1830 | 0.5568 | (0.5178, 0.5474) | Hap 0        |
|  |        |                    | 5232146 | 37  | 28  | 37   | 28   | 65   | 0.5692 | (0.1154, 0.9497) | Unclassified |
|  |        |                    | 5232573 | 425 | 344 | 462  | 372  | 834  | 0.5540 | (0.5001, 0.5651) | Unclassified |
|  |        |                    | 5233447 | 12  | 10  | 474  | 382  | 856  | 0.5537 | (0.5009, 0.5643) | Unclassified |
|  |        |                    | 5233643 | 29  | 28  | 503  | 410  | 913  | 0.5509 | (0.5029, 0.5623) | Unclassified |
|  |        |                    | 5234587 | 61  | 28  | 564  | 438  | 1002 | 0.5629 | (0.5055, 0.5597) | Hap 0        |
|  |        |                    | 5234781 | 102 | 77  | 102  | 77   | 179  | 0.5698 | (0.3811, 0.6841) | Unclassified |
|  |        |                    | 5236417 | 526 | 403 | 628  | 480  | 1108 | 0.5668 | (0.5081, 0.5571) | Hap 0        |
|  |        |                    | 5236851 | 475 | 369 | 475  | 369  | 844  | 0.5628 | (0.5005, 0.5647) | Unclassified |

|  |  |                         |         |     |     |      |      |      |        |                  |              |
|--|--|-------------------------|---------|-----|-----|------|------|------|--------|------------------|--------------|
|  |  |                         | 5243559 | 48  | 44  | 523  | 413  | 936  | 0.5588 | (0.5036, 0.5616) | Unclassified |
|  |  |                         | 5243613 | 95  | 104 | 618  | 517  | 1135 | 0.5445 | (0.5087, 0.5565) | Unclassified |
|  |  |                         | 5243757 | 361 | 309 | 979  | 826  | 1805 | 0.5424 | (0.5176, 0.5476) | Unclassified |
|  |  |                         | 5244299 | 209 | 161 | 1188 | 987  | 2175 | 0.5462 | (0.5201, 0.5451) | Hap 0        |
|  |  |                         | 5244404 | 284 | 179 | 284  | 179  | 463  | 0.6134 | (0.4740, 0.5912) | Hap 0        |
|  |  |                         | 5245507 | 346 | 273 | 346  | 273  | 619  | 0.5590 | (0.4888, 0.5764) | Unclassified |
|  |  |                         | 5246042 | 416 | 323 | 762  | 596  | 1358 | 0.5611 | (0.5126, 0.5526) | Hap 0        |
|  |  |                         | 5246356 | 532 | 342 | 532  | 342  | 874  | 0.6087 | (0.5016, 0.5636) | Hap 0        |
|  |  |                         | 5246512 | 368 | 338 | 368  | 338  | 706  | 0.5212 | (0.4942, 0.5710) | Unclassified |
|  |  |                         | 5247141 | 362 | 280 | 730  | 618  | 1348 | 0.5415 | (0.5125, 0.5527) | Unclassified |
|  |  |                         | 5247791 | 512 | 480 | 1242 | 1098 | 2340 | 0.5308 | (0.5210, 0.5442) | Unclassified |
|  |  |                         | 5248243 | 403 | 376 | 1645 | 1474 | 3119 | 0.5274 | (0.5239, 0.5413) | Unclassified |
|  |  |                         | 5248641 | 416 | 347 | 2061 | 1821 | 3882 | 0.5309 | (0.5256, 0.5396) | Unclassified |
|  |  |                         | 5248770 | 257 | 205 | 2318 | 2026 | 4344 | 0.5336 | (0.5264, 0.5388) | Unclassified |
|  |  |                         | 5248852 | 170 | 96  | 2488 | 2122 | 4610 | 0.5397 | (0.5267, 0.5385) | Hap 0        |
|  |  |                         | 5249715 | 351 | 154 | 351  | 154  | 505  | 0.6950 | (0.4789, 0.5863) | Hap 0        |
|  |  |                         | 5257189 | 455 | 359 | 455  | 359  | 814  | 0.5590 | (0.4993, 0.5659) | Unclassified |
|  |  |                         | 5259000 | 499 | 305 | 954  | 664  | 1618 | 0.5896 | (0.5158, 0.5494) | Hap 0        |
|  |  |                         | 5265941 | 436 | 324 | 436  | 324  | 760  | 0.5737 | (0.4969, 0.5683) | Hap 0        |
|  |  | type<br>$\beta$<br>SNPs | 5248329 | 400 | 431 | 400  | 431  | 831  | 0.4813 | (0.4348, 0.5000) | Unclassified |
|  |  |                         | 5249370 | 309 | 354 | 709  | 785  | 1494 | 0.4746 | (0.4493, 0.4856) | Unclassified |
|  |  |                         | 5256431 | 365 | 318 | 1074 | 1103 | 2177 | 0.4933 | (0.4550,         | Hap 0        |

|     |        |                    |         |     |     |     |     |      |        |                   |              |
|-----|--------|--------------------|---------|-----|-----|-----|-----|------|--------|-------------------|--------------|
|     |        |                    |         |     |     |     |     |      |        | 0.4799)           |              |
|     |        |                    | 5259534 | 39  | 15  | 39  | 15  | 54   | 0.7222 | (-0.0347, 0.9695) | Unclassified |
|     |        |                    | 5262782 | 438 | 469 | 477 | 484 | 961  | 0.4964 | (0.4392, 0.4956)  | Hap 0        |
|     |        |                    | 5263577 | 390 | 408 | 390 | 408 | 798  | 0.4887 | (0.4334, 0.5014)  | Unclassified |
|     |        |                    | 5264929 | 437 | 312 | 827 | 720 | 1547 | 0.5346 | (0.4499, 0.4849)  | Hap 0        |
|     |        |                    | 5265366 | 66  | 52  | 66  | 52  | 118  | 0.5593 | (0.2376, 0.6972)  | Unclassified |
|     |        |                    | 5265475 | 8   | 4   | 74  | 56  | 130  | 0.5692 | (0.2588, 0.6760)  | Unclassified |
|     |        |                    | 5266961 | 378 | 368 | 452 | 424 | 876  | 0.5160 | (0.4365, 0.4984)  | Hap 0        |
|     |        |                    | 5269140 | 593 | 512 | 593 | 512 | 1105 | 0.5367 | (0.4429, 0.4919)  | Hap 0        |
|     |        |                    | 5269799 | 292 | 295 | 292 | 295 | 587  | 0.4974 | (0.4212, 0.5136)  | Unclassified |
|     |        |                    | 5270418 | 477 | 419 | 769 | 714 | 1483 | 0.5185 | (0.4491, 0.4857)  | Hap 0        |
| F05 | Father | type $\alpha$ SNPs | 5255044 | 544 | 1   | 544 | 1   | 545  | 0.9982 | (0.9769, 0.9825)  | Hap 0        |
|     |        | type $\beta$ SNPs  | 5248329 | 106 | 835 | 106 | 835 | 941  | 0.1126 | (0.0274, 0.0325)  | Hap 0        |
|     |        |                    | 5249004 | 73  | 709 | 73  | 709 | 782  | 0.0934 | (0.0269, 0.0330)  | Hap 0        |
|     | Mother | type $\alpha$ SNPs | 5231897 | 518 | 523 | 518 | 523 | 1041 | 0.4976 | (0.5265, 0.5640)  | Hap 1        |
|     |        |                    | 5232212 | 38  | 17  | 38  | 17  | 55   | 0.6909 | (0.1911, 0.8994)  | Unclassified |
|     |        |                    | 5232573 | 503 | 482 | 541 | 499 | 1040 | 0.5202 | (0.5265, 0.5640)  | Hap 1        |
|     |        |                    | 5233643 | 28  | 31  | 28  | 31  | 59   | 0.4746 | (0.2151, 0.8754)  | Unclassified |
|     |        |                    | 5233697 | 120 | 131 | 148 | 162 | 310  | 0.4774 | (0.4824, 0.6081)  | Hap 1        |
|     |        |                    | 5234029 | 6   | 6   | 6   | 6   | 12   | 0.5000 | (-1.0781, 2.1686) | Unclassified |
|     |        |                    | 5234542 | 27  | 29  | 33  | 35  | 68   | 0.4853 | (0.2588, 0.8317)  | Unclassified |



|  |  |                         |         |     |     |     |     |      |        |                  |              |
|--|--|-------------------------|---------|-----|-----|-----|-----|------|--------|------------------|--------------|
|  |  |                         | 5234587 | 45  | 41  | 78  | 76  | 154  | 0.5065 | (0.4188, 0.6717) | Unclassified |
|  |  |                         | 5243856 | 465 | 412 | 543 | 488 | 1031 | 0.5267 | (0.5264, 0.5641) | Unclassified |
|  |  |                         | 5257778 | 450 | 507 | 993 | 995 | 1988 | 0.4995 | (0.5354, 0.5550) | Hap 1        |
|  |  |                         | 5263683 | 452 | 370 | 452 | 370 | 822  | 0.5499 | (0.5215, 0.5689) | Unclassified |
|  |  |                         | 5264146 | 511 | 471 | 963 | 841 | 1804 | 0.5338 | (0.5344, 0.5560) | Hap 1        |
|  |  |                         | 5265106 | 511 | 531 | 511 | 531 | 1042 | 0.4904 | (0.5266, 0.5639) | Hap 1        |
|  |  |                         | 5265680 | 254 | 253 | 254 | 253 | 507  | 0.5010 | (0.5068, 0.5837) | Hap 1        |
|  |  |                         | 5269931 | 420 | 305 | 420 | 305 | 725  | 0.5793 | (0.5184, 0.5721) | Hap 0        |
|  |  |                         | 5271671 | 563 | 472 | 563 | 472 | 1035 | 0.5440 | (0.5264, 0.5641) | Unclassified |
|  |  | type<br>$\beta$<br>SNPs | 5247992 | 383 | 745 | 383 | 745 | 1128 | 0.3395 | (0.4375, 0.4720) | Hap 1        |
|  |  |                         | 5250168 | 302 | 377 | 302 | 377 | 679  | 0.4448 | (0.4261, 0.4834) | Unclassified |
|  |  |                         | 5252251 | 222 | 423 | 524 | 800 | 1324 | 0.3958 | (0.4400, 0.4695) | Hap 1        |
|  |  |                         | 5253462 | 180 | 404 | 180 | 404 | 584  | 0.3082 | (0.4214, 0.4881) | Hap 1        |
|  |  |                         | 5253477 | 208 | 376 | 208 | 376 | 584  | 0.3562 | (0.4214, 0.4881) | Hap 1        |
|  |  |                         | 5255912 | 288 | 421 | 288 | 421 | 709  | 0.4062 | (0.4273, 0.4822) | Hap 1        |
|  |  |                         | 5256647 | 249 | 394 | 249 | 394 | 643  | 0.3872 | (0.4245, 0.4850) | Hap 1        |
|  |  |                         | 5258038 | 307 | 485 | 307 | 485 | 792  | 0.3876 | (0.4302, 0.4793) | Hap 1        |
|  |  |                         | 5258162 | 197 | 344 | 197 | 344 | 541  | 0.3641 | (0.4187, 0.4908) | Hap 1        |
|  |  |                         | 5258265 | 33  | 79  | 33  | 79  | 112  | 0.2946 | (0.2808, 0.6287) | Unclassified |
|  |  |                         | 5258429 | 136 | 250 | 169 | 329 | 498  | 0.3394 | (0.4156, 0.4939) | Hap 1        |
|  |  |                         | 5258490 | 199 | 450 | 199 | 450 | 649  | 0.3066 | (0.4247, 0.4848) | Hap 1        |
|  |  |                         | 5258592 | 367 | 639 | 367 | 639 | 1006 | 0.3648 | (0.4354, 0.4848) | Hap 1        |

|  |  |  |         |     |     |     |      |      |        |                     |              |
|--|--|--|---------|-----|-----|-----|------|------|--------|---------------------|--------------|
|  |  |  |         |     |     |     |      |      |        | 0.4741)             |              |
|  |  |  | 5258827 | 393 | 637 | 393 | 637  | 1030 | 0.3816 | (0.4358,<br>0.4737) | Hap 1        |
|  |  |  | 5258852 | 418 | 670 | 418 | 670  | 1088 | 0.3842 | (0.4368,<br>0.4727) | Hap 1        |
|  |  |  | 5258856 | 415 | 673 | 415 | 673  | 1088 | 0.3814 | (0.4368,<br>0.4727) | Hap 1        |
|  |  |  | 5258989 | 345 | 593 | 345 | 593  | 938  | 0.3678 | (0.4340,<br>0.4755) | Hap 1        |
|  |  |  | 5259103 | 352 | 666 | 352 | 666  | 1018 | 0.3458 | (0.4356,<br>0.4739) | Hap 1        |
|  |  |  | 5259289 | 157 | 281 | 157 | 281  | 438  | 0.3584 | (0.4103,<br>0.4992) | Hap 1        |
|  |  |  | 5259292 | 155 | 276 | 155 | 276  | 431  | 0.3596 | (0.4096,<br>0.5000) | Hap 1        |
|  |  |  | 5259419 | 22  | 40  | 22  | 40   | 62   | 0.3548 | (0.1406,<br>0.7689) | Unclassified |
|  |  |  | 5259727 | 320 | 405 | 342 | 445  | 787  | 0.4346 | (0.4300,<br>0.4795) | Unclassified |
|  |  |  | 5260458 | 363 | 604 | 705 | 1049 | 1754 | 0.4019 | (0.4436,<br>0.4659) | Hap 1        |
|  |  |  | 5260576 | 364 | 559 | 364 | 559  | 923  | 0.3944 | (0.4336,<br>0.4759) | Hap 1        |
|  |  |  | 5261239 | 413 | 601 | 413 | 601  | 1014 | 0.4073 | (0.4355,<br>0.4740) | Hap 1        |
|  |  |  | 5266728 | 395 | 608 | 395 | 608  | 1003 | 0.3938 | (0.4353,<br>0.4742) | Hap 1        |
|  |  |  | 5268406 | 377 | 593 | 377 | 593  | 970  | 0.3887 | (0.4347,<br>0.4748) | Hap 1        |
|  |  |  | 5268622 | 398 | 623 | 398 | 623  | 1021 | 0.3898 | (0.4357,<br>0.4738) | Hap 1        |
|  |  |  | 5268797 | 430 | 607 | 430 | 607  | 1037 | 0.4147 | (0.4360,<br>0.4735) | Hap 1        |
|  |  |  | 5269343 | 460 | 734 | 460 | 734  | 1194 | 0.3853 | (0.4384,<br>0.4711) | Hap 1        |
|  |  |  | 5269806 | 264 | 407 | 264 | 407  | 671  | 0.3934 | (0.4257,<br>0.4838) | Hap 1        |
|  |  |  | 5270246 | 399 | 405 | 399 | 405  | 804  | 0.4963 | (0.4305,<br>0.4790) | Hap 0        |
|  |  |  | 5270343 | 380 | 177 | 380 | 177  | 557  | 0.6822 | (0.4198,<br>0.4897) | Hap 0        |
|  |  |  | 5272154 | 461 | 742 | 461 | 742  | 1203 | 0.3832 | (0.4386,<br>0.4709) | Hap 1        |

|     |        |                          |         |     |     |     |     |     |        |                      |              |
|-----|--------|--------------------------|---------|-----|-----|-----|-----|-----|--------|----------------------|--------------|
| F06 | Father | type<br>$\alpha$<br>SNPs | 5229835 | 147 | 0   | 147 | 0   | 147 | 1.0000 | (0.9700,<br>0.9912)  | Hap 0        |
|     |        |                          | 5237435 | 25  | 0   | 25  | 0   | 25  | 1.0000 | (0.9180,<br>1.0432)  | Unclassified |
|     |        |                          | 5246514 | 418 | 0   | 443 | 0   | 443 | 1.0000 | (0.9771,<br>0.9841)  | Hap 0        |
|     |        | type<br>$\beta$<br>SNPs  | 5226579 | 0   | 11  | 0   | 11  | 11  | 0.0000 | (-0.1922,<br>0.2497) | Unclassified |
|     |        |                          | 5227950 | 3   | 135 | 3   | 146 | 149 | 0.0201 | (0.0124,<br>0.0451)  | Unclassified |
|     |        |                          | 5227975 | 5   | 148 | 8   | 294 | 302 | 0.0265 | (0.0207,<br>0.0368)  | Unclassified |
|     |        |                          | 5229010 | 29  | 348 | 37  | 642 | 679 | 0.0545 | (0.0252,<br>0.0323)  | Hap 0        |
|     |        |                          | 5229743 | 11  | 244 | 11  | 244 | 255 | 0.0431 | (0.0192,<br>0.0383)  | Hap 0        |
|     |        |                          | 5229745 | 10  | 248 | 10  | 248 | 258 | 0.0388 | (0.0193,<br>0.0382)  | Hap 0        |
|     |        |                          | 5230302 | 23  | 442 | 23  | 442 | 465 | 0.0495 | (0.0235,<br>0.0340)  | Hap 0        |
|     |        |                          | 5231897 | 29  | 471 | 29  | 471 | 500 | 0.0580 | (0.0239,<br>0.0336)  | Hap 0        |
|     |        |                          | 5232146 | 2   | 67  | 2   | 67  | 69  | 0.0290 | (-0.0065,<br>0.0640) | Unclassified |
|     |        |                          | 5232212 | 3   | 72  | 5   | 139 | 144 | 0.0347 | (0.0119,<br>0.0456)  | Unclassified |
|     |        |                          | 5232573 | 27  | 322 | 32  | 461 | 493 | 0.0649 | (0.0238,<br>0.0337)  | Hap 0        |
|     |        |                          | 5233643 | 13  | 209 | 13  | 209 | 222 | 0.0586 | (0.0178,<br>0.0397)  | Hap 0        |
|     |        |                          | 5233697 | 11  | 314 | 11  | 314 | 325 | 0.0338 | (0.0213,<br>0.0362)  | Unclassified |
|     |        |                          | 5233836 | 32  | 398 | 43  | 712 | 755 | 0.0570 | (0.0255,<br>0.0320)  | Hap 0        |
|     |        |                          | 5234029 | 28  | 421 | 28  | 421 | 449 | 0.0624 | (0.0233,<br>0.0342)  | Hap 0        |
|     |        |                          | 5234542 | 0   | 21  | 0   | 21  | 21  | 0.0000 | (-0.0870,<br>0.1445) | Unclassified |
|     |        |                          | 5234587 | 0   | 13  | 0   | 34  | 34  | 0.0000 | (-0.0427,<br>0.1002) | Unclassified |
|     |        |                          | 5236417 | 24  | 424 | 24  | 458 | 482 | 0.0498 | (0.0237,<br>0.0338)  | Hap 0        |

|  |        |                    |         |     |     |     |     |     |        |                  |              |
|--|--------|--------------------|---------|-----|-----|-----|-----|-----|--------|------------------|--------------|
|  |        |                    | 5236740 | 29  | 381 | 29  | 381 | 410 | 0.0707 | (0.0228, 0.0347) | Hap 0        |
|  |        |                    | 5237284 | 6   | 159 | 6   | 159 | 165 | 0.0364 | (0.0140, 0.0435) | Unclassified |
|  |        |                    | 5237498 | 0   | 14  | 6   | 173 | 179 | 0.0335 | (0.0152, 0.0423) | Unclassified |
|  |        |                    | 5243757 | 14  | 209 | 20  | 382 | 402 | 0.0498 | (0.0227, 0.0348) | Hap 0        |
|  |        |                    | 5244144 | 6   | 125 | 6   | 125 | 131 | 0.0458 | (0.0102, 0.0473) | Unclassified |
|  |        |                    | 5244299 | 9   | 81  | 15  | 206 | 221 | 0.0679 | (0.0178, 0.0397) | Hap 0        |
|  |        |                    | 5245406 | 9   | 141 | 9   | 141 | 150 | 0.0600 | (0.0125, 0.0449) | Hap 0        |
|  |        |                    | 5245507 | 12  | 140 | 12  | 140 | 152 | 0.0789 | (0.0128, 0.0447) | Hap 0        |
|  |        |                    | 5246000 | 30  | 303 | 30  | 303 | 333 | 0.0901 | (0.0214, 0.0360) | Hap 0        |
|  |        |                    | 5246042 | 26  | 334 | 26  | 334 | 360 | 0.0722 | (0.0220, 0.0355) | Hap 0        |
|  |        |                    | 5246203 | 52  | 408 | 52  | 408 | 460 | 0.1130 | (0.0235, 0.0340) | Hap 0        |
|  |        |                    | 5246512 | 35  | 388 | 35  | 388 | 423 | 0.0827 | (0.0230, 0.0345) | Hap 0        |
|  |        |                    | 5247141 | 21  | 242 | 21  | 242 | 263 | 0.0798 | (0.0195, 0.0380) | Hap 0        |
|  |        |                    | 5247153 | 21  | 226 | 21  | 226 | 247 | 0.0850 | (0.0189, 0.0386) | Hap 0        |
|  |        |                    | 5247733 | 28  | 338 | 28  | 338 | 366 | 0.0765 | (0.0221, 0.0354) | Hap 0        |
|  |        |                    | 5247791 | 27  | 459 | 27  | 459 | 486 | 0.0556 | (0.0237, 0.0337) | Hap 0        |
|  |        |                    | 5248243 | 35  | 406 | 35  | 406 | 441 | 0.0794 | (0.0232, 0.0343) | Hap 0        |
|  |        |                    | 5248641 | 20  | 286 | 20  | 286 | 306 | 0.0654 | (0.0208, 0.0367) | Hap 0        |
|  | Mother | type $\alpha$ SNPs | 5230648 | 94  | 111 | 94  | 111 | 205 | 0.4585 | (0.4421, 0.6434) | Unclassified |
|  |        | type $\beta$ SNPs  | 5248200 | 262 | 205 | 262 | 205 | 467 | 0.5610 | (0.4131, 0.5015) | Hap 0        |
|  |        |                    | 5248842 | 67  | 58  | 67  | 58  | 125 | 0.5360 | (0.2922, 0.6224) | Unclassified |

|     |        |                          |         |     |   |     |   |     |        |                     |              |
|-----|--------|--------------------------|---------|-----|---|-----|---|-----|--------|---------------------|--------------|
| F07 | Father | type<br>$\alpha$<br>SNPs | 5234678 | 114 | 0 | 114 | 0 | 114 | 1.0000 | (0.9690,<br>0.9978) | Hap 0        |
|     |        |                          | 5250168 | 395 | 0 | 395 | 0 | 395 | 1.0000 | (0.9793,<br>0.9876) | Hap 0        |
|     |        |                          | 5252251 | 322 | 1 | 322 | 1 | 323 | 0.9969 | (0.9783,<br>0.9885) | Hap 0        |
|     |        |                          | 5253477 | 277 | 0 | 277 | 0 | 277 | 1.0000 | (0.9775,<br>0.9893) | Hap 0        |
|     |        |                          | 5255912 | 408 | 0 | 408 | 0 | 408 | 1.0000 | (0.9794,<br>0.9874) | Hap 0        |
|     |        |                          | 5256431 | 542 | 0 | 542 | 0 | 542 | 1.0000 | (0.9804,<br>0.9865) | Hap 0        |
|     |        |                          | 5256647 | 264 | 0 | 264 | 0 | 264 | 1.0000 | (0.9772,<br>0.9896) | Hap 0        |
|     |        |                          | 5258038 | 463 | 0 | 463 | 0 | 463 | 1.0000 | (0.9799,<br>0.9870) | Hap 0        |
|     |        |                          | 5258162 | 356 | 0 | 356 | 0 | 356 | 1.0000 | (0.9788,<br>0.9880) | Hap 0        |
|     |        |                          | 5258265 | 75  | 0 | 75  | 0 | 75  | 1.0000 | (0.9615,<br>1.0053) | Unclassified |
|     |        |                          | 5258429 | 228 | 0 | 303 | 0 | 303 | 1.0000 | (0.9780,<br>0.9888) | Hap 0        |
|     |        |                          | 5258490 | 302 | 0 | 302 | 0 | 302 | 1.0000 | (0.9780,<br>0.9889) | Hap 0        |
|     |        |                          | 5258592 | 503 | 0 | 503 | 0 | 503 | 1.0000 | (0.9802,<br>0.9867) | Hap 0        |
|     |        |                          | 5258827 | 543 | 0 | 543 | 0 | 543 | 1.0000 | (0.9804,<br>0.9864) | Hap 0        |
|     |        |                          | 5258852 | 558 | 0 | 558 | 0 | 558 | 1.0000 | (0.9805,<br>0.9864) | Hap 0        |
|     |        |                          | 5258856 | 556 | 0 | 556 | 0 | 556 | 1.0000 | (0.9805,<br>0.9864) | Hap 0        |
|     |        |                          | 5258989 | 478 | 0 | 478 | 0 | 478 | 1.0000 | (0.9800,<br>0.9869) | Hap 0        |
|     |        |                          | 5259289 | 227 | 0 | 227 | 0 | 227 | 1.0000 | (0.9762,<br>0.9907) | Hap 0        |
|     |        |                          | 5259292 | 212 | 0 | 212 | 0 | 212 | 1.0000 | (0.9757,<br>0.9912) | Hap 0        |
|     |        |                          | 5259419 | 41  | 0 | 41  | 0 | 41  | 1.0000 | (0.9434,<br>1.0234) | Unclassified |
|     |        |                          | 5259534 | 41  | 0 | 82  | 0 | 82  | 1.0000 | (0.9634,<br>1.0034) | Unclassified |
|     |        |                          | 5259727 | 374 | 0 | 456 | 0 | 456 | 1.0000 | (0.9798,<br>0.9869) | Hap 0        |

|  |  |                         |         |     |     |     |     |     |         |                  |              |
|--|--|-------------------------|---------|-----|-----|-----|-----|-----|---------|------------------|--------------|
|  |  |                         |         |     |     |     |     |     | 0.9870) |                  |              |
|  |  |                         | 5260458 | 484 | 0   | 484 | 0   | 484 | 1.0000  | (0.9800, 0.9868) | Hap 0        |
|  |  |                         | 5260576 | 537 | 0   | 537 | 0   | 537 | 1.0000  | (0.9804, 0.9865) | Hap 0        |
|  |  |                         | 5261239 | 505 | 0   | 505 | 0   | 505 | 1.0000  | (0.9802, 0.9867) | Hap 0        |
|  |  |                         | 5262782 | 628 | 0   | 628 | 0   | 628 | 1.0000  | (0.9808, 0.9860) | Hap 0        |
|  |  |                         | 5263577 | 575 | 0   | 575 | 0   | 575 | 1.0000  | (0.9806, 0.9863) | Hap 0        |
|  |  |                         | 5264929 | 401 | 0   | 401 | 0   | 401 | 1.0000  | (0.9793, 0.9875) | Hap 0        |
|  |  |                         | 5265366 | 67  | 1   | 67  | 1   | 68  | 0.9853  | (0.9593, 1.0076) | Unclassified |
|  |  |                         | 5265475 | 11  | 0   | 78  | 1   | 79  | 0.9873  | (0.9627, 1.0042) | Unclassified |
|  |  |                         | 5266728 | 490 | 0   | 568 | 1   | 569 | 0.9982  | (0.9805, 0.9863) | Hap 0        |
|  |  |                         | 5266961 | 444 | 0   | 444 | 0   | 444 | 1.0000  | (0.9797, 0.9871) | Hap 0        |
|  |  |                         | 5268406 | 487 | 0   | 487 | 0   | 487 | 1.0000  | (0.9801, 0.9868) | Hap 0        |
|  |  |                         | 5268622 | 613 | 0   | 613 | 0   | 613 | 1.0000  | (0.9807, 0.9861) | Hap 0        |
|  |  |                         | 5268797 | 509 | 0   | 509 | 0   | 509 | 1.0000  | (0.9802, 0.9866) | Hap 0        |
|  |  |                         | 5269140 | 616 | 1   | 616 | 1   | 617 | 0.9984  | (0.9808, 0.9861) | Hap 0        |
|  |  |                         | 5269343 | 502 | 0   | 502 | 0   | 502 | 1.0000  | (0.9802, 0.9867) | Hap 0        |
|  |  |                         | 5269799 | 345 | 0   | 345 | 0   | 345 | 1.0000  | (0.9787, 0.9882) | Hap 0        |
|  |  |                         | 5269806 | 356 | 2   | 356 | 2   | 358 | 0.9944  | (0.9788, 0.9880) | Hap 0        |
|  |  |                         | 5270418 | 525 | 0   | 525 | 0   | 525 | 1.0000  | (0.9803, 0.9865) | Hap 0        |
|  |  |                         | 5270539 | 408 | 0   | 408 | 0   | 408 | 1.0000  | (0.9794, 0.9874) | Hap 0        |
|  |  |                         | 5272154 | 593 | 0   | 593 | 0   | 593 | 1.0000  | (0.9807, 0.9862) | Hap 0        |
|  |  | type<br>$\beta$<br>SNPs | 5246514 | 24  | 462 | 24  | 462 | 486 | 0.0494  | (0.0196, 0.0304) | Hap 0        |

|     |        |                    |         |     |     |     |     |     |        |                   |              |
|-----|--------|--------------------|---------|-----|-----|-----|-----|-----|--------|-------------------|--------------|
|     |        |                    | 5247904 | 28  | 531 | 28  | 531 | 559 | 0.0501 | (0.0203, 0.0297)  | Hap 0        |
|     |        |                    | 5250551 | 27  | 553 | 27  | 553 | 580 | 0.0466 | (0.0205, 0.0295)  | Hap 0        |
|     |        |                    | 5253586 | 19  | 445 | 19  | 445 | 464 | 0.0409 | (0.0193, 0.0306)  | Hap 0        |
|     |        |                    | 5258336 | 2   | 55  | 2   | 55  | 57  | 0.0351 | (-0.0210, 0.0709) | Unclassified |
|     | Mother | type $\alpha$ SNPs | 5248770 | 165 | 177 | 165 | 177 | 342 | 0.4825 | (0.4616, 0.6086)  | Unclassified |
|     |        |                    | 5249004 | 266 | 187 | 431 | 364 | 795 | 0.5421 | (0.5035, 0.5668)  | Unclassified |
|     |        | type $\beta$ SNPs  | 5247992 | 236 | 328 | 236 | 328 | 564 | 0.4184 | (0.4203, 0.5094)  | Hap 1        |
|     |        |                    | 5257575 | 203 | 299 | 203 | 299 | 502 | 0.4044 | (0.4148, 0.5149)  | Hap 1        |
| F08 | Father | type $\alpha$ SNPs | 5226579 | 31  | 0   | 31  | 0   | 31  | 1.0000 | (0.9300, 1.0426)  | Unclassified |
|     |        |                    | 5227471 | 331 | 0   | 362 | 0   | 362 | 1.0000 | (0.9815, 0.9911)  | Hap 0        |
|     |        |                    | 5229010 | 480 | 0   | 480 | 0   | 480 | 1.0000 | (0.9827, 0.9899)  | Hap 0        |
|     |        |                    | 5232212 | 97  | 0   | 97  | 0   | 97  | 1.0000 | (0.9683, 1.0043)  | Unclassified |
|     |        |                    | 5233697 | 348 | 0   | 445 | 0   | 445 | 1.0000 | (0.9824, 0.9902)  | Hap 0        |
|     |        |                    | 5233836 | 443 | 0   | 443 | 0   | 443 | 1.0000 | (0.9824, 0.9903)  | Hap 0        |
|     |        |                    | 5234029 | 470 | 0   | 470 | 0   | 470 | 1.0000 | (0.9826, 0.9900)  | Hap 0        |
|     |        |                    | 5234542 | 23  | 0   | 23  | 0   | 23  | 1.0000 | (0.9105, 1.0622)  | Unclassified |
|     |        |                    | 5236740 | 458 | 0   | 481 | 0   | 481 | 1.0000 | (0.9827, 0.9899)  | Hap 0        |
|     |        |                    | 5237284 | 190 | 0   | 190 | 0   | 190 | 1.0000 | (0.9771, 0.9955)  | Hap 0        |
|     |        |                    | 5237498 | 25  | 0   | 25  | 0   | 25  | 1.0000 | (0.9165, 1.0561)  | Unclassified |
|     |        |                    | 5244144 | 168 | 0   | 193 | 0   | 193 | 1.0000 | (0.9773, 0.9954)  | Hap 0        |
|     |        |                    | 5245406 | 341 | 0   | 341 | 0   | 341 | 1.0000 | (0.9812, 0.9954)  | Hap 0        |

|     |        |                    |         |     |     |     |     |      |        |                   |              |
|-----|--------|--------------------|---------|-----|-----|-----|-----|------|--------|-------------------|--------------|
|     |        |                    |         |     |     |     |     |      |        | 0.9914)           |              |
|     |        |                    | 5246000 | 449 | 0   | 449 | 0   | 449  | 1.0000 | (0.9824, 0.9902)  | Hap 0        |
|     |        |                    | 5246203 | 522 | 0   | 522 | 0   | 522  | 1.0000 | (0.9830, 0.9897)  | Hap 0        |
|     |        |                    | 5247733 | 435 | 0   | 435 | 0   | 435  | 1.0000 | (0.9823, 0.9903)  | Hap 0        |
|     |        | type $\beta$ SNPs  | 5228143 | 27  | 507 | 27  | 507 | 534  | 0.0506 | (0.0156, 0.0265)  | Hap 0        |
|     |        |                    | 5228708 | 20  | 428 | 20  | 428 | 448  | 0.0446 | (0.0146, 0.0275)  | Hap 0        |
|     |        |                    | 5229196 | 30  | 371 | 30  | 371 | 401  | 0.0748 | (0.0138, 0.0283)  | Hap 0        |
|     |        |                    | 5233447 | 8   | 271 | 8   | 271 | 279  | 0.0287 | (0.0107, 0.0314)  | Unclassified |
|     |        |                    | 5234781 | 1   | 20  | 9   | 291 | 300  | 0.0300 | (0.0114, 0.0307)  | Unclassified |
|     |        |                    | 5236851 | 13  | 481 | 22  | 772 | 794  | 0.0277 | (0.0174, 0.0247)  | Hap 0        |
|     |        |                    | 5243559 | 3   | 52  | 3   | 52  | 55   | 0.0545 | (-0.0315, 0.0737) | Unclassified |
|     |        |                    | 5243613 | 9   | 107 | 12  | 159 | 171  | 0.0702 | (0.0041, 0.0380)  | Hap 0        |
|     |        |                    | 5244404 | 6   | 213 | 6   | 213 | 219  | 0.0274 | (0.0079, 0.0343)  | Unclassified |
|     |        |                    | 5246356 | 22  | 457 | 28  | 670 | 698  | 0.0401 | (0.0169, 0.0252)  | Hap 0        |
|     |        |                    | 5248330 | 13  | 521 | 13  | 521 | 534  | 0.0243 | (0.0156, 0.0265)  | Unclassified |
|     |        |                    | 5253166 | 10  | 336 | 23  | 857 | 880  | 0.0261 | (0.0178, 0.0244)  | Hap 0        |
|     | Mother | type $\alpha$ SNPs | 5255843 | 322 | 234 | 322 | 234 | 556  | 0.5791 | (0.4699, 0.5853)  | Unclassified |
|     |        | type $\beta$ SNPs  | 5248200 | 261 | 259 | 261 | 259 | 520  | 0.5019 | (0.4108, 0.5341)  | Unclassified |
|     |        |                    | 5250551 | 283 | 257 | 544 | 516 | 1060 | 0.5132 | (0.4422, 0.5027)  | Hap 0        |
|     |        |                    | 5258336 | 85  | 95  | 85  | 95  | 180  | 0.4722 | (0.2943, 0.6506)  | Unclassified |
| F09 | Father | type $\alpha$      | 5229835 | 708 | 46  | 708 | 46  | 754  | 0.9390 | (0.9831, 0.9876)  | Hap 1        |



|  |  | SNPs                    |         |     |      |     |      |      |        |                   |              |
|--|--|-------------------------|---------|-----|------|-----|------|------|--------|-------------------|--------------|
|  |  |                         | 5237435 | 11  | 0    | 11  | 0    | 11   | 1.0000 | (0.8302, 1.1405)  | Unclassified |
|  |  |                         | 5246514 | 889 | 84   | 900 | 84   | 984  | 0.9146 | (0.9836, 0.9871)  | Hap 1        |
|  |  | type<br>$\beta$<br>SNPs | 5226579 | 0   | 116  | 0   | 116  | 116  | 0.0000 | (-0.0017, 0.0464) | Unclassified |
|  |  |                         | 5227471 | 0   | 754  | 0   | 870  | 870  | 0.0000 | (0.0192, 0.0256)  | Hap 1        |
|  |  |                         | 5227950 | 1   | 863  | 1   | 863  | 864  | 0.0012 | (0.0191, 0.0256)  | Hap 1        |
|  |  |                         | 5227975 | 0   | 827  | 0   | 827  | 827  | 0.0000 | (0.0190, 0.0257)  | Hap 1        |
|  |  |                         | 5229010 | 0   | 1158 | 0   | 1158 | 1158 | 0.0000 | (0.0200, 0.0248)  | Hap 1        |
|  |  |                         | 5229743 | 1   | 849  | 1   | 849  | 850  | 0.0012 | (0.0191, 0.0257)  | Hap 1        |
|  |  |                         | 5229745 | 0   | 847  | 0   | 847  | 847  | 0.0000 | (0.0191, 0.0257)  | Hap 1        |
|  |  |                         | 5230302 | 2   | 1144 | 2   | 1144 | 1146 | 0.0017 | (0.0199, 0.0248)  | Hap 1        |
|  |  |                         | 5231897 | 4   | 1150 | 4   | 1150 | 1154 | 0.0035 | (0.0200, 0.0248)  | Hap 1        |
|  |  |                         | 5232146 | 0   | 71   | 0   | 71   | 71   | 0.0000 | (-0.0169, 0.0617) | Unclassified |
|  |  |                         | 5232212 | 0   | 95   | 0   | 166  | 166  | 0.0000 | (0.0056, 0.0392)  | Hap 1        |
|  |  |                         | 5232573 | 1   | 983  | 1   | 983  | 984  | 0.0010 | (0.0195, 0.0252)  | Hap 1        |
|  |  |                         | 5233643 | 0   | 59   | 0   | 59   | 59   | 0.0000 | (-0.0249, 0.0696) | Unclassified |
|  |  |                         | 5233697 | 0   | 219  | 0   | 278  | 278  | 0.0000 | (0.0123, 0.0324)  | Hap 1        |
|  |  |                         | 5233836 | 2   | 709  | 2   | 709  | 711  | 0.0028 | (0.0184, 0.0263)  | Hap 1        |
|  |  |                         | 5234029 | 0   | 15   | 0   | 15   | 15   | 0.0000 | (-0.1636, 0.2083) | Unclassified |
|  |  |                         | 5234542 | 0   | 89   | 0   | 104  | 104  | 0.0000 | (-0.0045, 0.0492) | Unclassified |
|  |  |                         | 5234587 | 0   | 129  | 0   | 233  | 233  | 0.0000 | (0.0104, 0.0343)  | Hap 1        |
|  |  |                         | 5236417 | 2   | 1127 | 2   | 1127 | 1129 | 0.0018 | (0.0199, 0.0248)  | Hap 1        |

|  |        |                          |         |     |      |     |      |      |        |                   |              |
|--|--------|--------------------------|---------|-----|------|-----|------|------|--------|-------------------|--------------|
|  |        |                          | 5236740 | 2   | 536  | 2   | 536  | 538  | 0.0037 | (0.0172, 0.0276)  | Hap 1        |
|  |        |                          | 5237284 | 0   | 283  | 0   | 283  | 283  | 0.0000 | (0.0125, 0.0322)  | Hap 1        |
|  |        |                          | 5243757 | 0   | 855  | 0   | 855  | 855  | 0.0000 | (0.0191, 0.0256)  | Hap 1        |
|  |        |                          | 5244144 | 2   | 781  | 2   | 781  | 783  | 0.0026 | (0.0188, 0.0259)  | Hap 1        |
|  |        |                          | 5244299 | 0   | 566  | 0   | 566  | 566  | 0.0000 | (0.0174, 0.0273)  | Hap 1        |
|  |        |                          | 5244814 | 0   | 80   | 0   | 80   | 80   | 0.0000 | (-0.0125, 0.0572) | Unclassified |
|  |        |                          | 5245507 | 3   | 808  | 3   | 888  | 891  | 0.0034 | (0.0192, 0.0255)  | Hap 1        |
|  |        |                          | 5246000 | 4   | 946  | 4   | 946  | 950  | 0.0042 | (0.0194, 0.0253)  | Hap 1        |
|  |        |                          | 5246042 | 4   | 916  | 4   | 916  | 920  | 0.0043 | (0.0193, 0.0254)  | Hap 1        |
|  |        |                          | 5246203 | 9   | 1000 | 9   | 1000 | 1009 | 0.0089 | (0.0196, 0.0251)  | Hap 1        |
|  |        |                          | 5246512 | 4   | 957  | 4   | 957  | 961  | 0.0042 | (0.0195, 0.0253)  | Hap 1        |
|  |        |                          | 5247141 | 1   | 840  | 1   | 840  | 841  | 0.0012 | (0.0191, 0.0257)  | Hap 1        |
|  |        |                          | 5247733 | 0   | 1111 | 0   | 1111 | 1111 | 0.0000 | (0.0199, 0.0249)  | Hap 1        |
|  |        |                          | 5247791 | 1   | 1188 | 1   | 1188 | 1189 | 0.0008 | (0.0200, 0.0247)  | Hap 1        |
|  |        |                          | 5248243 | 4   | 920  | 4   | 920  | 924  | 0.0043 | (0.0194, 0.0254)  | Hap 1        |
|  |        |                          | 5248641 | 0   | 946  | 0   | 946  | 946  | 0.0000 | (0.0194, 0.0253)  | Hap 1        |
|  |        |                          | 5248852 | 1   | 418  | 1   | 418  | 419  | 0.0024 | (0.0157, 0.0290)  | Hap 1        |
|  |        |                          | 5249004 | 2   | 740  | 2   | 740  | 742  | 0.0027 | (0.0186, 0.0261)  | Hap 1        |
|  |        |                          | 5260098 | 2   | 817  | 2   | 817  | 819  | 0.0024 | (0.0190, 0.0258)  | Hap 1        |
|  | Mather | type<br>$\alpha$<br>SNPs | 5257189 | 470 | 454  | 470 | 454  | 924  | 0.5087 | (0.4983, 0.5619)  | Unclassified |
|  |        |                          | 5257324 | 496 | 507  | 966 | 961  | 1927 | 0.5013 | (0.5148, 0.5453)  | Hap 1        |
|  |        |                          | 5259000 | 549 | 387  | 549 | 387  | 936  | 0.5865 | (0.4987,          | Hap 0        |

|     |        |                          |         |     |     |     |     |     |        |                  |              |
|-----|--------|--------------------------|---------|-----|-----|-----|-----|-----|--------|------------------|--------------|
|     |        |                          |         |     |     |     |     |     |        | 0.5615)          |              |
|     |        |                          | 5262001 | 478 | 492 | 478 | 492 | 970 | 0.4928 | (0.4998, 0.5604) | Hap 1        |
| F10 | Father | type<br>$\alpha$<br>SNPs | 5227950 | 505 | 1   | 505 | 1   | 506 | 0.9980 | (0.9838, 0.9908) | Hap 0        |
|     |        |                          | 5227975 | 499 | 0   | 499 | 0   | 499 | 1.0000 | (0.9837, 0.9909) | Hap 0        |
|     |        |                          | 5228708 | 549 | 1   | 549 | 1   | 550 | 0.9982 | (0.9840, 0.9905) | Hap 0        |
|     |        |                          | 5229196 | 427 | 0   | 427 | 0   | 427 | 1.0000 | (0.9831, 0.9915) | Hap 0        |
|     |        |                          | 5229743 | 413 | 1   | 413 | 1   | 414 | 0.9976 | (0.9830, 0.9916) | Hap 0        |
|     |        |                          | 5229745 | 411 | 1   | 411 | 1   | 412 | 0.9976 | (0.9830, 0.9916) | Hap 0        |
|     |        |                          | 5230302 | 538 | 0   | 538 | 0   | 538 | 1.0000 | (0.9840, 0.9906) | Hap 0        |
|     |        |                          | 5231897 | 542 | 2   | 542 | 2   | 544 | 0.9963 | (0.9840, 0.9906) | Hap 0        |
|     |        |                          | 5232146 | 44  | 0   | 44  | 0   | 44  | 1.0000 | (0.9466, 1.0280) | Unclassified |
|     |        |                          | 5232573 | 544 | 2   | 588 | 2   | 590 | 0.9966 | (0.9843, 0.9903) | Hap 0        |
|     |        |                          | 5233094 | 215 | 0   | 215 | 0   | 215 | 1.0000 | (0.9790, 0.9956) | Hap 0        |
|     |        |                          | 5233643 | 30  | 0   | 30  | 0   | 30  | 1.0000 | (0.9277, 1.0469) | Unclassified |
|     |        |                          | 5234580 | 62  | 0   | 92  | 0   | 92  | 1.0000 | (0.9679, 1.0067) | Unclassified |
|     |        |                          | 5234587 | 69  | 0   | 161 | 0   | 161 | 1.0000 | (0.9762, 0.9984) | Hap 0        |
|     |        |                          | 5236417 | 561 | 2   | 561 | 2   | 563 | 0.9964 | (0.9841, 0.9905) | Hap 0        |
|     |        |                          | 5236851 | 574 | 0   | 574 | 0   | 574 | 1.0000 | (0.9842, 0.9904) | Hap 0        |
|     |        |                          | 5243559 | 63  | 0   | 63  | 0   | 63  | 1.0000 | (0.9589, 1.0157) | Unclassified |
|     |        |                          | 5243613 | 170 | 0   | 233 | 0   | 233 | 1.0000 | (0.9796, 0.9950) | Hap 0        |
|     |        |                          | 5243757 | 504 | 1   | 504 | 1   | 505 | 0.9980 | (0.9838, 0.9908) | Hap 0        |
|     |        |                          | 5244299 | 380 | 3   | 380 | 3   | 383 | 0.9922 | (0.9826, 0.9920) | Hap 0        |

|     |        |                    |         |     |     |     |     |     |        |                  |              |
|-----|--------|--------------------|---------|-----|-----|-----|-----|-----|--------|------------------|--------------|
|     |        |                    | 5244404 | 396 | 0   | 396 | 0   | 396 | 1.0000 | (0.9828, 0.9918) | Hap 0        |
|     |        |                    | 5245507 | 430 | 0   | 430 | 0   | 430 | 1.0000 | (0.9831, 0.9915) | Hap 0        |
|     |        |                    | 5246042 | 418 | 4   | 418 | 4   | 422 | 0.9905 | (0.9831, 0.9915) | Unclassified |
|     |        |                    | 5246356 | 543 | 0   | 961 | 4   | 965 | 0.9959 | (0.9854, 0.9892) | Hap 0        |
|     |        |                    | 5246512 | 418 | 0   | 418 | 0   | 418 | 1.0000 | (0.9830, 0.9916) | Hap 0        |
|     |        |                    | 5247141 | 431 | 4   | 431 | 4   | 435 | 0.9908 | (0.9832, 0.9914) | Unclassified |
|     |        |                    | 5247791 | 453 | 2   | 884 | 6   | 890 | 0.9933 | (0.9853, 0.9893) | Hap 0        |
|     |        |                    | 5248243 | 468 | 0   | 468 | 0   | 468 | 1.0000 | (0.9835, 0.9911) | Hap 0        |
|     |        |                    | 5248641 | 445 | 4   | 445 | 4   | 449 | 0.9911 | (0.9833, 0.9913) | Unclassified |
|     |        |                    | 5248770 | 362 | 0   | 807 | 4   | 811 | 0.9951 | (0.9851, 0.9895) | Hap 0        |
|     |        |                    | 5248852 | 243 | 1   | 243 | 1   | 244 | 0.9959 | (0.9800, 0.9946) | Hap 0        |
|     |        |                    | 5249004 | 350 | 3   | 350 | 3   | 353 | 0.9915 | (0.9822, 0.9924) | Unclassified |
|     | Mother | type $\beta$ SNPs  | 5268681 | 205 | 253 | 205 | 253 | 458 | 0.4476 | (0.3979, 0.5520) | Unclassified |
| F11 | Father | type $\alpha$ SNPs | 5227950 | 545 | 0   | 545 | 0   | 545 | 1.0000 | (0.9760, 0.9815) | Hap 0        |
|     |        |                    | 5227975 | 516 | 0   | 516 | 0   | 516 | 1.0000 | (0.9758, 0.9817) | Hap 0        |
|     |        |                    | 5229509 | 621 | 0   | 621 | 0   | 621 | 1.0000 | (0.9763, 0.9812) | Hap 0        |
|     |        |                    | 5229743 | 369 | 2   | 369 | 2   | 371 | 0.9946 | (0.9746, 0.9829) | Hap 0        |
|     |        |                    | 5231897 | 560 | 4   | 560 | 4   | 564 | 0.9929 | (0.9760, 0.9815) | Hap 0        |
|     |        |                    | 5232146 | 47  | 0   | 47  | 0   | 47  | 1.0000 | (0.9463, 1.0112) | Unclassified |
|     |        |                    | 5232573 | 553 | 4   | 600 | 4   | 604 | 0.9934 | (0.9762, 0.9813) | Hap 0        |
|     |        |                    | 5233643 | 35  | 0   | 35  | 0   | 35  | 1.0000 | (0.9352, 1.0223) | Unclassified |

|  |  |  |         |     |   |     |   |     |        |                  |              |
|--|--|--|---------|-----|---|-----|---|-----|--------|------------------|--------------|
|  |  |  | 5234587 | 70  | 0 | 105 | 0 | 105 | 1.0000 | (0.9642, 0.9933) | Hap 0        |
|  |  |  | 5236417 | 685 | 1 | 685 | 1 | 686 | 0.9985 | (0.9765, 0.9810) | Hap 0        |
|  |  |  | 5243757 | 520 | 4 | 520 | 4 | 524 | 0.9924 | (0.9758, 0.9817) | Hap 0        |
|  |  |  | 5244299 | 415 | 0 | 415 | 0 | 415 | 1.0000 | (0.9751, 0.9824) | Hap 0        |
|  |  |  | 5245507 | 477 | 0 | 477 | 0 | 477 | 1.0000 | (0.9756, 0.9819) | Hap 0        |
|  |  |  | 5246042 | 533 | 0 | 533 | 0 | 533 | 1.0000 | (0.9759, 0.9816) | Hap 0        |
|  |  |  | 5246512 | 590 | 2 | 590 | 2 | 592 | 0.9966 | (0.9762, 0.9813) | Hap 0        |
|  |  |  | 5247141 | 563 | 3 | 563 | 3 | 566 | 0.9947 | (0.9761, 0.9814) | Hap 0        |
|  |  |  | 5247791 | 631 | 2 | 631 | 2 | 633 | 0.9968 | (0.9763, 0.9812) | Hap 0        |
|  |  |  | 5248243 | 542 | 1 | 542 | 1 | 543 | 0.9982 | (0.9759, 0.9816) | Hap 0        |
|  |  |  | 5248641 | 561 | 1 | 561 | 1 | 562 | 0.9982 | (0.9760, 0.9815) | Hap 0        |
|  |  |  | 5248770 | 410 | 2 | 410 | 2 | 412 | 0.9951 | (0.9751, 0.9824) | Hap 0        |
|  |  |  | 5250168 | 508 | 0 | 508 | 0 | 508 | 1.0000 | (0.9758, 0.9818) | Hap 0        |
|  |  |  | 5252251 | 352 | 0 | 352 | 0 | 352 | 1.0000 | (0.9744, 0.9831) | Hap 0        |
|  |  |  | 5253477 | 354 | 0 | 354 | 0 | 354 | 1.0000 | (0.9744, 0.9831) | Hap 0        |
|  |  |  | 5255912 | 461 | 0 | 461 | 0 | 461 | 1.0000 | (0.9754, 0.9821) | Hap 0        |
|  |  |  | 5256647 | 344 | 0 | 344 | 0 | 344 | 1.0000 | (0.9743, 0.9832) | Hap 0        |
|  |  |  | 5257778 | 629 | 0 | 629 | 0 | 629 | 1.0000 | (0.9763, 0.9812) | Hap 0        |
|  |  |  | 5258162 | 344 | 0 | 344 | 0 | 344 | 1.0000 | (0.9743, 0.9832) | Hap 0        |
|  |  |  | 5258265 | 71  | 0 | 71  | 0 | 71  | 1.0000 | (0.9573, 1.0002) | Unclassified |
|  |  |  | 5258429 | 255 | 0 | 326 | 0 | 326 | 1.0000 | (0.9741, 0.9834) | Hap 0        |
|  |  |  | 5258490 | 371 | 0 | 371 | 0 | 371 | 1.0000 | (0.9746, 0.9829) | Hap 0        |

|  |  |  |         |     |   |     |   |     |        |                  |              |
|--|--|--|---------|-----|---|-----|---|-----|--------|------------------|--------------|
|  |  |  | 5258592 | 606 | 0 | 606 | 0 | 606 | 1.0000 | (0.9762, 0.9813) | Hap 0        |
|  |  |  | 5258827 | 596 | 1 | 596 | 1 | 597 | 0.9983 | (0.9762, 0.9813) | Hap 0        |
|  |  |  | 5258852 | 630 | 0 | 630 | 0 | 630 | 1.0000 | (0.9763, 0.9812) | Hap 0        |
|  |  |  | 5258856 | 622 | 3 | 622 | 3 | 625 | 0.9952 | (0.9763, 0.9812) | Hap 0        |
|  |  |  | 5258989 | 531 | 0 | 531 | 0 | 531 | 1.0000 | (0.9759, 0.9816) | Hap 0        |
|  |  |  | 5259289 | 316 | 0 | 316 | 0 | 316 | 1.0000 | (0.9739, 0.9836) | Hap 0        |
|  |  |  | 5259292 | 303 | 0 | 303 | 0 | 303 | 1.0000 | (0.9737, 0.9838) | Hap 0        |
|  |  |  | 5259419 | 51  | 0 | 51  | 0 | 51  | 1.0000 | (0.9489, 1.0086) | Unclassified |
|  |  |  | 5259727 | 432 | 0 | 483 | 0 | 483 | 1.0000 | (0.9756, 0.9819) | Hap 0        |
|  |  |  | 5260458 | 568 | 0 | 568 | 0 | 568 | 1.0000 | (0.9761, 0.9814) | Hap 0        |
|  |  |  | 5260576 | 612 | 0 | 612 | 0 | 612 | 1.0000 | (0.9763, 0.9812) | Hap 0        |
|  |  |  | 5261239 | 639 | 0 | 639 | 0 | 639 | 1.0000 | (0.9764, 0.9811) | Hap 0        |
|  |  |  | 5263683 | 515 | 1 | 515 | 1 | 516 | 0.9981 | (0.9758, 0.9817) | Hap 0        |
|  |  |  | 5264146 | 692 | 0 | 692 | 0 | 692 | 1.0000 | (0.9765, 0.9810) | Hap 0        |
|  |  |  | 5265106 | 667 | 0 | 667 | 0 | 667 | 1.0000 | (0.9765, 0.9810) | Hap 0        |
|  |  |  | 5265680 | 299 | 0 | 299 | 0 | 299 | 1.0000 | (0.9737, 0.9838) | Hap 0        |
|  |  |  | 5266728 | 574 | 0 | 574 | 0 | 574 | 1.0000 | (0.9761, 0.9814) | Hap 0        |
|  |  |  | 5268406 | 592 | 0 | 592 | 0 | 592 | 1.0000 | (0.9762, 0.9813) | Hap 0        |
|  |  |  | 5268622 | 621 | 0 | 621 | 0 | 621 | 1.0000 | (0.9763, 0.9812) | Hap 0        |
|  |  |  | 5268797 | 583 | 0 | 583 | 0 | 583 | 1.0000 | (0.9761, 0.9814) | Hap 0        |
|  |  |  | 5269343 | 719 | 0 | 719 | 0 | 719 | 1.0000 | (0.9766, 0.9809) | Hap 0        |
|  |  |  | 5269806 | 365 | 1 | 365 | 1 | 366 | 0.9973 | (0.9746, 0.9829) | Hap 0        |

|     |        |                    |         |     |     |     |     |      |        |                   |              |
|-----|--------|--------------------|---------|-----|-----|-----|-----|------|--------|-------------------|--------------|
|     |        |                    | 5269931 | 492 | 2   | 492 | 2   | 494  | 0.9960 | (0.9757, 0.9818)  | Hap 0        |
|     |        |                    | 5271671 | 680 | 0   | 680 | 0   | 680  | 1.0000 | (0.9765, 0.9810)  | Hap 0        |
|     |        |                    | 5272154 | 704 | 1   | 704 | 1   | 705  | 0.9986 | (0.9766, 0.9809)  | Hap 0        |
|     | Mother | type $\alpha$ SNPs | 5228143 | 377 | 242 | 377 | 242 | 619  | 0.6090 | (0.5181, 0.5776)  | Hap 0        |
|     |        |                    | 5228708 | 383 | 252 | 383 | 252 | 635  | 0.6031 | (0.5188, 0.5768)  | Hap 0        |
|     |        |                    | 5229196 | 369 | 235 | 369 | 235 | 604  | 0.6109 | (0.5173, 0.5783)  | Hap 0        |
|     |        |                    | 5233447 | 11  | 4   | 11  | 4   | 15   | 0.7333 | (-0.6803, 1.7759) | Unclassified |
|     |        |                    | 5234781 | 80  | 51  | 91  | 55  | 146  | 0.6233 | (0.4216, 0.6740)  | Unclassified |
|     |        |                    | 5236851 | 360 | 276 | 451 | 331 | 782  | 0.5767 | (0.5243, 0.5714)  | Hap 0        |
|     |        |                    | 5243559 | 36  | 35  | 36  | 35  | 71   | 0.5070 | (0.2884, 0.8073)  | Unclassified |
|     |        |                    | 5243613 | 71  | 83  | 107 | 118 | 225  | 0.4756 | (0.4659, 0.6297)  | Unclassified |
|     |        |                    | 5244404 | 272 | 164 | 379 | 282 | 661  | 0.5734 | (0.5199, 0.5757)  | Unclassified |
|     |        |                    | 5246356 | 368 | 206 | 747 | 488 | 1235 | 0.6049 | (0.5329, 0.5627)  | Hap 0        |
|     |        |                    | 5248852 | 154 | 48  | 154 | 48  | 202  | 0.7624 | (0.4566, 0.6390)  | Hap 0        |
|     |        |                    | 5249004 | 300 | 171 | 300 | 171 | 471  | 0.6369 | (0.5087, 0.5869)  | Hap 0        |
|     |        |                    | 5258042 | 323 | 217 | 323 | 217 | 540  | 0.5981 | (0.5137, 0.5819)  | Hap 0        |
|     |        |                    | 5260382 | 464 | 277 | 464 | 277 | 741  | 0.6262 | (0.5230, 0.5727)  | Hap 0        |
|     |        |                    | 5269235 | 434 | 310 | 434 | 310 | 744  | 0.5833 | (0.5231, 0.5726)  | Hap 0        |
| F12 | Father | type $\alpha$ SNPs | 5248852 | 87  | 3   | 87  | 3   | 90   | 0.9667 | (0.9678, 1.0087)  | Hap 1        |
|     |        | type $\beta$ SNPs  | 5250261 | 0   | 288 | 0   | 288 | 288  | 0.0000 | (0.0074, 0.0293)  | Hap 1        |
|     | Mother | type               | 5227471 | 110 | 116 | 110 | 116 | 226  | 0.4867 | (0.3489,          | Unclassified |

|  |  |                  |         |     |     |      |      |      |        |                     |              |
|--|--|------------------|---------|-----|-----|------|------|------|--------|---------------------|--------------|
|  |  | $\alpha$<br>SNPs |         |     |     |      |      |      |        | 0.6962)             |              |
|  |  |                  | 5227950 | 44  | 63  | 154  | 179  | 333  | 0.4625 | (0.4047,<br>0.6404) | Unclassified |
|  |  |                  | 5227975 | 51  | 65  | 205  | 244  | 449  | 0.4566 | (0.4352,<br>0.6099) | Unclassified |
|  |  |                  | 5229010 | 175 | 170 | 380  | 414  | 794  | 0.4786 | (0.4731,<br>0.5720) | Unclassified |
|  |  |                  | 5229743 | 104 | 166 | 484  | 580  | 1064 | 0.4549 | (0.4857,<br>0.5594) | Hap 1        |
|  |  |                  | 5230302 | 220 | 232 | 220  | 232  | 452  | 0.4867 | (0.4357,<br>0.6094) | Unclassified |
|  |  |                  | 5231897 | 228 | 228 | 448  | 460  | 908  | 0.4934 | (0.4793,<br>0.5658) | Unclassified |
|  |  |                  | 5232146 | 19  | 24  | 467  | 484  | 951  | 0.4911 | (0.4813,<br>0.5638) | Unclassified |
|  |  |                  | 5232212 | 10  | 20  | 477  | 504  | 981  | 0.4862 | (0.4826,<br>0.5626) | Unclassified |
|  |  |                  | 5232573 | 152 | 123 | 629  | 627  | 1256 | 0.5008 | (0.4913,<br>0.5538) | Unclassified |
|  |  |                  | 5233643 | 100 | 95  | 729  | 722  | 1451 | 0.5024 | (0.4955,<br>0.5496) | Unclassified |
|  |  |                  | 5233697 | 143 | 139 | 872  | 861  | 1733 | 0.5032 | (0.4999,<br>0.5452) | Unclassified |
|  |  |                  | 5233836 | 181 | 181 | 1053 | 1042 | 2095 | 0.5026 | (0.5038,<br>0.5413) | Hap 1        |
|  |  |                  | 5234029 | 163 | 177 | 163  | 177  | 340  | 0.4794 | (0.4071,<br>0.6380) | Unclassified |
|  |  |                  | 5234542 | 9   | 6   | 172  | 183  | 355  | 0.4845 | (0.4120,<br>0.6331) | Unclassified |
|  |  |                  | 5236417 | 187 | 239 | 359  | 422  | 781  | 0.4597 | (0.4723,<br>0.5728) | Hap 1        |
|  |  |                  | 5236740 | 145 | 175 | 145  | 175  | 320  | 0.4531 | (0.3999,<br>0.6452) | Unclassified |
|  |  |                  | 5237284 | 89  | 76  | 234  | 251  | 485  | 0.4825 | (0.4417,<br>0.6035) | Unclassified |
|  |  |                  | 5243757 | 123 | 132 | 357  | 383  | 740  | 0.4824 | (0.4695,<br>0.5756) | Unclassified |
|  |  |                  | 5244144 | 47  | 56  | 404  | 439  | 843  | 0.4792 | (0.4760,<br>0.5691) | Unclassified |
|  |  |                  | 5244299 | 28  | 39  | 432  | 478  | 910  | 0.4747 | (0.4794,<br>0.5657) | Hap 1        |
|  |  |                  | 5245406 | 132 | 165 | 132  | 165  | 297  | 0.4444 | (0.3904,<br>0.6547) | Unclassified |



|     |        |                    |         |     |     |      |      |      |        |                  |              |
|-----|--------|--------------------|---------|-----|-----|------|------|------|--------|------------------|--------------|
|     |        |                    | 5245507 | 114 | 145 | 246  | 310  | 556  | 0.4424 | (0.4520, 0.5931) | Hap 1        |
|     |        |                    | 5246000 | 189 | 189 | 189  | 189  | 378  | 0.5000 | (0.4187, 0.6264) | Unclassified |
|     |        |                    | 5246042 | 205 | 187 | 394  | 376  | 770  | 0.5117 | (0.4716, 0.5735) | Unclassified |
|     |        |                    | 5246203 | 226 | 225 | 620  | 601  | 1221 | 0.5078 | (0.4904, 0.5547) | Unclassified |
|     |        |                    | 5246512 | 168 | 180 | 788  | 781  | 1569 | 0.5022 | (0.4975, 0.5476) | Unclassified |
|     |        |                    | 5247141 | 126 | 127 | 914  | 908  | 1822 | 0.5016 | (0.5010, 0.5441) | Unclassified |
|     |        |                    | 5247733 | 138 | 182 | 1052 | 1090 | 2142 | 0.4911 | (0.5042, 0.5409) | Hap 1        |
|     |        |                    | 5247791 | 194 | 208 | 194  | 208  | 402  | 0.4826 | (0.4249, 0.6202) | Unclassified |
|     |        |                    | 5248243 | 211 | 186 | 405  | 394  | 799  | 0.5069 | (0.4734, 0.5717) | Unclassified |
|     |        |                    | 5248641 | 188 | 182 | 593  | 576  | 1169 | 0.5073 | (0.4890, 0.5561) | Unclassified |
|     |        |                    | 5248770 | 140 | 116 | 733  | 692  | 1425 | 0.5144 | (0.4950, 0.5501) | Unclassified |
|     |        |                    | 5248842 | 30  | 59  | 763  | 751  | 1514 | 0.5040 | (0.4966, 0.5485) | Unclassified |
|     |        |                    | 5257189 | 160 | 156 | 923  | 907  | 1830 | 0.5044 | (0.5011, 0.5440) | Unclassified |
|     |        |                    | 5259000 | 243 | 140 | 1166 | 1047 | 2213 | 0.5269 | (0.5048, 0.5403) | Unclassified |
| F13 | Father | type $\alpha$ SNPs | 5225021 | 129 | 0   | 129  | 0    | 129  | 1.0000 | (0.9728, 0.9998) | Hap 0        |
|     |        |                    | 5228143 | 618 | 0   | 618  | 0    | 618  | 1.0000 | (0.9835, 0.9891) | Hap 0        |
|     |        |                    | 5228708 | 628 | 0   | 628  | 0    | 628  | 1.0000 | (0.9835, 0.9891) | Hap 0        |
|     |        |                    | 5229196 | 589 | 0   | 589  | 0    | 589  | 1.0000 | (0.9834, 0.9893) | Hap 0        |
|     |        |                    | 5236792 | 559 | 0   | 559  | 0    | 559  | 1.0000 | (0.9832, 0.9894) | Hap 0        |
|     |        |                    | 5236851 | 612 | 0   | 612  | 0    | 612  | 1.0000 | (0.9835, 0.9892) | Hap 0        |
|     |        |                    | 5253586 | 571 | 0   | 571  | 0    | 571  | 1.0000 | (0.9833, 0.9894) | Hap 0        |
|     | Mother | type               | 5227950 | 289 | 236 | 289  | 236  | 525  | 0.5505 | (0.4665,         | Unclassified |

|  |  |                         |         |     |     |      |      |      |        |                     |              |
|--|--|-------------------------|---------|-----|-----|------|------|------|--------|---------------------|--------------|
|  |  | $\alpha$<br>SNPs        |         |     |     |      |      |      |        | 0.5887)             |              |
|  |  |                         | 5227975 | 257 | 234 | 546  | 470  | 1016 | 0.5374 | (0.4960,<br>0.5591) | Unclassified |
|  |  |                         | 5229743 | 187 | 220 | 733  | 690  | 1423 | 0.5151 | (0.5050,<br>0.5501) | Unclassified |
|  |  |                         | 5231897 | 364 | 296 | 1097 | 986  | 2083 | 0.5266 | (0.5122,<br>0.5430) | Unclassified |
|  |  |                         | 5232573 | 337 | 248 | 1434 | 1234 | 2668 | 0.5375 | (0.5156,<br>0.5396) | Unclassified |
|  |  |                         | 5236417 | 294 | 283 | 1728 | 1517 | 3245 | 0.5325 | (0.5177,<br>0.5375) | Unclassified |
|  |  |                         | 5247876 | 301 | 244 | 2029 | 1761 | 3790 | 0.5354 | (0.5191,<br>0.5360) | Unclassified |
|  |  |                         | 5249004 | 260 | 172 | 2289 | 1933 | 4222 | 0.5422 | (0.5200,<br>0.5352) | Hap 0        |
|  |  | type<br>$\beta$<br>SNPs | 5249290 | 256 | 258 | 256  | 258  | 514  | 0.4981 | (0.4100,<br>0.5348) | Unclassified |
